# Supplementary material for: Relationship between hormone replacement therapy and spinal osteoarthritis: a nationwide health survey analysis of the elderly Korean population
Source: PubMed Central journal article supplement — BMJ Open. 2017 Nov 9;7(11):e018063. doi: 10.1136/bmjopen-2017-018063 (PMC5695470; doi:10.1136/bmjopen-2017-018063), 2017-11-09
Supplement: bmjopen-2017-018063.draft_revisions.pdf [file bmjopen-2017-018063.draft_revisions.pdf]

# BMJ Open

BMJ Open is committed to open peer review. As part of this commitment we make the peer review history of every article we publish publicly available.

When an article is published we post the peer reviewers' comments and the authors' responses online. We also post the versions of the paper that were used during peer review. These are the versions that the peer review comments apply to.

The versions of the paper that follow are the versions that were submitted during the peer review process. They are not the versions of record or the final published versions. They should not be cited or distributed as the published version of this manuscript.

BMJ Open is an open access journal and the full, final, typeset and author-corrected version of record of the manuscript is available on our site with no access controls, subscription charges or pay-per-view fees (<http://bmjopen.bmj.com>).

If you have any questions on BMJ Open's open peer review process please email [editorial.bmjopen@bmj.com](mailto:editorial.bmjopen@bmj.com)

# BMJ Open

## The relationship between hormone replacement therapy and symptomatic spine osteoarthritis : A nationwide health survey analysis of the elderly Korean population

|                                 |                                                                                                                                                                                                                                                                                                           |
|---------------------------------|-----------------------------------------------------------------------------------------------------------------------------------------------------------------------------------------------------------------------------------------------------------------------------------------------------------|
| Journal:                        | <i>BMJ Open</i>                                                                                                                                                                                                                                                                                           |
| Manuscript ID                   | bmjopen-2017-018063                                                                                                                                                                                                                                                                                       |
| Article Type:                   | Research                                                                                                                                                                                                                                                                                                  |
| Date Submitted by the Author:   | 11-Jun-2017                                                                                                                                                                                                                                                                                               |
| Complete List of Authors:       | Park, Jung-Ho; Department of Orthopedics<br>Hong, Jae-Young; Department of Orthopedics<br>Han, Kyungdo; College of Medicine, Catholic University<br>Han, Seung-Woo; Department of Orthopedics<br>Chun, Eun Mi; Ewha Woman's University Mokdong Hospital, Division of Pulmonary and Critical Care Medicine |
| <b>Primary Subject Heading</b>: | Rheumatology                                                                                                                                                                                                                                                                                              |
| Secondary Subject Heading:      | Epidemiology, Public health                                                                                                                                                                                                                                                                               |
| Keywords:                       | osteoarthritis, Spine < ORTHOPAEDIC & TRAUMA SURGERY, hormone replacement therapy                                                                                                                                                                                                                         |
|                                 |                                                                                                                                                                                                                                                                                                           |

SCHOLARONE™  
Manuscripts

**Title:****The relationship between hormone replacement therapy  
and symptomatic spine osteoarthritis****: A nationwide health survey analysis of the elderly Korean population****Authors:****Jung-Ho Park,<sup>1</sup> MD, PhD; Jae-Young Hong,<sup>1</sup> MD, PhD; Kyungdo Han,<sup>2</sup> PhD;  
Seung-Woo Han,<sup>1</sup> MD; Eun Mi Chun,<sup>3</sup> MD, PhD.****From**

<sup>1</sup> The Department of Orthopedics, Korea University Ansan Hospital, Ansan, South  
Korea

<sup>2</sup> The Department of Biostatistics, College of Medicine, Catholic University, Seoul,  
South Korea

<sup>3</sup> The Division of Pulmonary and Critical Care Medicine, The Department of Internal  
Medicine, Ewha Woman's University Mokdong Hospital, Seoul South Korea

**Corresponding Author:**

**Jae-Young Hong;** Department of Orthopedics, Korea University Ansan Hospital,  
Gojan Dong, Danwon Gu, Ansan 425-707, South Korea

Ph: +82-31-412-6577 Fax: +82-31-487-9502

Email: osspine@korea.ac.kr

## Abstract

### Objectives

To identify the effect of hormone replacement therapy (HRT) on symptomatic spine osteoarthritis (OA).

### Methods and design

Cross-sectional study of a nationwide survey was performed.

### Setting

This study collected data from the fifth Korean National Health and Nutrition Examination Survey (KNHANES V-5; 2010–2012).

### Participants

After excluding ineligible respondents, the total number of participants in this study was 4,265 females. All participants reported symptoms and disabilities related to spine OA. In addition, plain radiographs of the spine were taken of all patients.

### Primary and secondary outcome measures

Demographic and lifestyle variables was compared between HRT and non-HRT group.

In addition, radiographic examination and symptom assessment was performed to determine the existence of spine OA.

### Results

In terms of demographic factors, marital status, education, income, and HRT were significantly related to spine OA morbidity. A risk analysis of related factors showed significant effects of HRT and age on spine OA (odds ratios: 0.717 and 1.257,  $P < 0.05$ ). Nevertheless, in the HRT group, smokers had a significantly increased risk of spine OA ( $P < 0.05$ ). The spine OA group exhibited a significantly lower prevalence

1  
2  
3  
4 of HRT. In addition, the HRT group demonstrated a lower incidence of symptomatic  
5  
6 spine OA. Calculated risks for compromised morbidity with HRT to incidence of spine  
7  
8 OA were 0.717 (odds ratio). The duration of HRT was also related to the risk of spine  
9  
10 OA. The group that had been taking medication for more than one year showed  
11  
12 significantly decreased risks (odds ratio: 0.686) compared to patients with less than  
13  
14 one year of medication (odds ratio: 0.744;  $P < 0.05$ ).  
15  
16

### 17 18 **Conclusion**

19  
20 Women receiving HRT showed a significantly lower prevalence of spine OA.  
21  
22 Hormone replacement therapy was closely related to spine OA morbidity.  
23  
24

25 **Key words:** Osteoarthritis, Spine, Hormone replacement therapy  
26  
27  
28  
29  
30  
31  
32  
33  
34  
35  
36  
37  
38  
39  
40  
41  
42  
43  
44  
45  
46  
47  
48  
49  
50  
51  
52  
53  
54  
55  
56  
57  
58  
59  
60

## Strength and limitations of this study

-Study included a large cross-sectional population and utilized sophisticated statistical methods, which may enhance the significance of the result.

-Study included analysis of demographic and lifestyle variables as well as radiographic examination and symptom assessment, which may enhance the significance of the result.

-Cross-sectional study design prevented establishing causal relationships between HRT and OA.

-More sophisticated diagnostic tools, such as magnetic resonance imaging or computed tomography, may be needed to evaluate the precise status of patient joints. -The prevalence or etiology of OA may also be influenced by ethnic or environmental factors, which may decrease the generalizability of our study.

## Introduction

Menopause is a particularly influential period during which women adapt to a new biological state. Women in the postmenopausal period tend to have lower estradiol and serotonin concentrations and high levels of follicle stimulating hormone.[1-4] Hormone replacement therapy (HRT) has shown several benefits for elderly females because it minimizes symptoms related to estrogen deficiency.[1, 3-8] However, few studies have investigated the effects of hormonal therapy on the musculoskeletal system. Recently, more people are experiencing degenerative osteoarthritis (OA), which can occur in several mobile joints of the body, including the spine. The objective of this study was to estimate the association between hormonal factors and spine OA in a Korean population. We analyzed a large cross-sectional population using data from the Korea National Health and Nutrition Examination Survey (KNHANES) to determine the relationship between HRT and symptomatic spine OA.

## Methods

### Study population

The study design was cross-sectional using three years of data from the Fifth Korean National Health and Nutrition Examination Survey (KNHANES-V: 2010–2012). The KNHANES is a nationwide health and nutrition survey that is conducted regularly. The number of participants who completed both the health interview and health examination surveys was 25,534 (Figure 1). We excluded men (n=11,616), premenopausal women (n=9,372) and those with missing data for variables included in the analysis (n=281). The remaining 4,265 participants had undergone physical and laboratory examinations, including a radiographic examination of the spine. In addition, health interview data were retrieved, including demographic and lifestyle variables. All participants provided informed consent, and the Korea Centers for Disease Control and Prevention Institutional Review Board approved this study (2010-02CON-21-C, 2011-02CON-06-C, 2012-01EXP-01-2C).

### Radiographic examination and symptom assessment

Anteroposterior and lateral plain radiographic examinations of the lumbar spine were taken using a SD3000 Synchro Stand (Accele Ray, Switzerland). Radiographic changes of each joint were independently assessed by two radiologists using the Kellgren/Lawrence (KL) grading system as follows: Grade 0, no visible features of OA, doubtful/questionable osteophytes; Grade 1, minimal, definitive small osteophytes; and Grade 2, definitive moderate osteophytes or subchondral bone cysts and sclerosis with or without foraminal stenosis.[9] The presence of radiographic OA was defined as a KL grade of 2 or more. If the grades given by the



1  
2  
3  
4 two radiologists differed, the higher grade was accepted. The concordance rate  
5  
6 regarding the KL grade within one grade for the same case was 94.76%. In addition,  
7  
8 all patients described their joint-related symptoms (e.g., spine), and these symptoms  
9  
10 were scored. Participants who had experienced arthritic pain for more than one  
11  
12 month in the past three months were asked to report the pain's intensity regardless  
13  
14 of whether they used medication using a numeric rating scale (NRS) ranging from 0–  
15  
16 10.  
17  
18  
19  
20  
21

### 22 **Demographic and lifestyle variables**

23  
24 HRT was defined as more than one year of regular hormone medication intake.  
25  
26 Exogenous hormone-related factors included oral contraceptive (OC) use duration  
27  
28 and HRT starting age and duration. Demographic variables were age, gender,  
29  
30 monthly household income, marital status, current residence, education level,  
31  
32 smoking status (never smoker, past smoker or current smoker), alcohol consumption  
33  
34 (g/d), and physical activity (low, moderate or high). Household income was  
35  
36 calculated as the monthly household income divided by the square root of the  
37  
38 number of members. Education was classified by years of schooling (<6 years, 7–9  
39  
40 years, 10–12, and >12 years). Marital status was stratified into three groups: never  
41  
42 married, married and living with a spouse, or married but living alone due to divorce  
43  
44 or the death of a spouse. Respondents who had smoked more than 100 cigarettes in  
45  
46 their lifetime were classified as smokers and placed into the smoker group. Physical  
47  
48 activity was quantified according to the Korean version of the International Physical  
49  
50 Activity Questionnaire. Body weight and height were obtained, and the body mass  
51  
52 index was calculated by dividing the body weight in kg by the height<sup>2</sup> in m<sup>2</sup>. Waist  
53  
54 circumference was measured between the lower costal margin and the iliac crest.  
55  
56  
57  
58  
59  
60

1  
2  
3  
4 We defined obesity as a body mass index  $\geq 25$ .  
5  
6  
7

### 8 **Statistical analyses**

9  
10 Statistical analyses were conducted using SAS survey procedures (version 9.3; SAS  
11 Institute, Cary, NC, US) in a manner that reflected the sampling weights and  
12 provided nationally representative estimates. The characteristics of patients with  
13 spine OA were compared with those of participants without spine OA using two  
14 independent sample *t*-tests, a one-way analysis of variance for continuous variables  
15 and Chi-square tests for categorical variables. Multivariate logistic regression  
16 analyses were conducted to investigate the relationship between parameters. A *p*-  
17 value  $< 0.05$  was considered statistically significant.  
18  
19  
20  
21  
22  
23  
24  
25  
26  
27  
28  
29  
30  
31  
32  
33  
34  
35  
36  
37  
38  
39  
40  
41  
42  
43  
44  
45  
46  
47  
48  
49  
50  
51  
52  
53  
54  
55  
56  
57  
58  
59  
60

## Results

### The relationship between demographic factors and spine OA

We defined spine OA as definite osteoarthritis on plain radiographs with related spinal pain. The mean age of the study population was  $64.3 \pm 0.2$  (50–94) years. In terms of demographic factors, marital status, education, income, and HRT were significantly related to spine OA morbidity (Table 1,  $P < 0.05$ ). A risk analysis of related factors showed significant effects of HRT and age on spine OA (odds ratios: 0.717 and 1.257, respectively, Table 2,  $P < 0.05$ ). However, in the HRT group, smokers showed a significantly increased risk of spine OA (odds ratio (OR): 11.3) compared to nonsmokers (Table 3).

### Relationship between HRT and spine OA

The HRT group had a lower prevalence of spine OA ( $P < 0.05$ ). In addition, the spine OA group showed a significantly lower rate of HRT (Table 4,  $P < 0.05$ ). Calculated risks for compromised morbidity were 0.717 (odds ratio) compared to the control group (Table 5). Solitary radiographic spine OA or solitary symptom groups also showed a lower percentage of HRT than controls (ORs: 0.723 and 0.916, respectively); however, the radiographic OA plus symptom group demonstrated the lowest percentage of HRT with a significantly higher morbidity (OR: 0.717,  $P < 0.05$ ). The duration of HRT was also related to the risk of spine OA; the  $>1$  year of medication group had a significantly decreased risk (OR: 0.686) compared to the  $<1$  year of medication group (OR: 0.840).

## Discussion

Osteoarthritis involves degenerative changes in soft tissue, subchondral bone and hyaline cartilage, which lead to serious joint disability.[5, 10-14] Estrogen deficiency is related to the occurrence and progression of OA. Beginning in early menopause, the number of patients suffering from OA dramatically increases.[1-6, 10, 15, 16] The association between estrogen and OA has been verified in a murine model, and research on both estrogen deficiency and complement in articular cartilage has been conducted in animal models.[17] In many experimental animal studies, ovariectomy was reported to induce OA, while the estrogen complement delayed cartilage degeneration.[6, 8, 18-21] Estrogens act on estrogen receptors distributed throughout articular cartilage, the synovial membrane and ligaments and are thought to be related to degenerative changes. The positive effect `` women of the same age not receiving HRT. Moreover, patients receiving long-term HRT have a lower risk of knee and hip OA on plain radiographs compared to women who do not take HRT.[2, 3, 5, 13, 17]

In this study, age, marital status, educational level, and income were significantly related to osteoarthritis morbidity. However, BMI and body composition factors were not associated with spine OA. Previous studies have reported that joint pain is associated with several socio-demographic factors, such as gender, advanced age, low education level, smoking, and occupation.[10, 14] In particular, we found

1  
2  
3  
4 significant relationships between factors in the female group and a higher prevalence  
5 of OA. It appears that the female population is more prone to OA, and this  
6 association may be related to hormonal influences, especially in an elderly  
7 population. Yang et al. reported that estrogens act on estrogen receptors distributed  
8 in articular cartilage, the synovial membrane and ligaments, which are thought to be  
9 related to degenerative changes.[17] They found that estrogen replacement therapy  
10 reduced the severity of OA in this experimental model. In our study, the HRT group  
11 showed a significantly lower prevalence of spine OA. The spine OA group also had a  
12 significantly lower rate of HRT. We therefore assumed that HRT might influence the  
13 incidence of spine OA. We found a positive, long-term effect of HRT, suggesting that  
14 estrogen deficiency may be a cause of OA and highlighting the need for further  
15 studies on the effects of estrogen on cartilage and bone. Although we could not  
16 determine cause and effect relationships, HRT may prevent OA. We hypothesized  
17 that HRT may have a positive effect on the development of radiographic spinal OA.  
18 Accordingly, spinal pain decreased along with a lowered prevalence of radiographic  
19 spinal OA. The duration of hormonal therapy also showed a significant relationship  
20 with the incidence of spine OA, which suggests the importance of continuous HRT in  
21 elderly females.  
22  
23  
24  
25  
26  
27  
28  
29  
30  
31  
32  
33  
34  
35  
36  
37  
38  
39  
40  
41  
42  
43  
44  
45

46 In the present study, smoking was not significantly related to spine OA morbidity,  
47 whereas smoking did impact the increased prevalence of spine OA, especially in the  
48 HRT group. However, the association between the risk of OA and smoking is still  
49 unclear. Some studies have reported that smoking is a protective factor against  
50 severe OA. In contrast, observational studies have concluded that smoking has no  
51 protective effect on the progression of OA.[7, 23-28] Nevertheless, smokers  
52  
53  
54  
55  
56  
57  
58  
59  
60

1  
2  
3  
4 prescribed HRT showed a significantly increased risk of OA compared to  
5 nonsmokers taking HRT, although the use of HRT had a protective effect on OA in  
6 the present study and also in some previous studies. These data showed that  
7 smoking may have a hazardous effect on joint cartilage that could eliminate the  
8 protective effect of OA used by HRT.  
9  
10  
11  
12  
13

14  
15  
16  
17 This study has several limitations. First, the cross-sectional study design prevented  
18 us from establishing causal relationships between HRT and OA. In this study, we  
19 could not match the OA site and spinal pain origin. We used a cross-sectional  
20 nationwide health survey with a brief health interview regarding pain related to each  
21 joint (e.g., the hip, knee and spine). Therefore, we could not clarify the relationship  
22 between spine OA and pain that was spinal in origin. Future prospective studies will  
23 be required to determine causal relationships. Second, the use of a single 11-point  
24 NRS did not allow us to evaluate the exact intensity of the respondents' acute and  
25 chronic pain, including functional impairment. In addition, more sophisticated  
26 diagnostic tools, such as magnetic resonance imaging or computed tomography,  
27 may be needed to evaluate the precise status of patient joints. Third, we cannot  
28 confirm or generalize our results to other populations because of ethnic differences  
29 between countries. The prevalence or etiology of OA may also be influenced by  
30 ethnic or environmental factors, which may decrease the generalizability of our study.  
31  
32 Despite these limitations, our study included a large cross-sectional population and  
33 utilized sophisticated statistical methods. In addition, we found a significantly lower  
34 prevalence of spine OA in patients receiving HRT. We believe that our results will be  
35 helpful to physicians treating OA  
36  
37  
38  
39  
40  
41  
42  
43  
44  
45  
46  
47  
48  
49  
50  
51  
52  
53  
54  
55  
56  
57  
58  
59  
60

1  
2  
3  
4 In conclusion, HRT was closely related to spine OA morbidity. Populations receiving  
5  
6 HRT showed a significantly lower prevalence of spine OA, and the duration of HRT  
7  
8 was significantly related to OA spine prevalence.  
9  
10

## 11 12 13 14 15 16 17 18 19 20 21 **Figure legends**

### 22 23 **Figure 1**

24  
25 A flow chart showing the inclusion and exclusion of participants according to the  
26  
27 study's criteria.  
28  
29  
30  
31  
32  
33  
34  
35  
36  
37  
38  
39  
40  
41  
42  
43  
44  
45  
46  
47  
48  
49  
50  
51  
52  
53  
54  
55  
56  
57  
58  
59  
60

## Author contributions

All authors made substantial contributions to sections (1), (2) and (3) described below:

- (1) Study conception and design, data acquisition, or data analysis and interpretations- **JHP, JYH**
- (2) Drafting of the manuscript or revising it critically for important intellectual content- **KDH, SWH**
- (3) Final approval of the version to be submitted- **EMC, JYH**

## Conflict of interest

There are no conflicts of interest to report.

## Funding

This study was not supported by fund or grant.

## Data sharing statement



1  
2  
3  
4 Fifth Korean National Health and Nutrition Examination Survey (KNHANES-V: 2010–  
5  
6 2012) data is available to any researchers under approval of IRB.  
7  
8  
9  
10  
11  
12  
13  
14  
15  
16  
17  
18  
19  
20  
21  
22  
23

## 24 **References**

- 26 1. Effects of hormone therapy on bone mineral density: results from the  
27 postmenopausal estrogen/progestin interventions (PEPI) trial. The Writing  
28 Group for the PEPI. JAMA, 1996. **276**(17): p. 1389-96.  
29  
30
- 31 2. Wluka AE, Davis SR, Bailey M, et al. - Users of oestrogen replacement  
32 therapy have more knee cartilage than non-users. Ann Rheum Dis, 2001.  
33 **60**(4): p. 332-6.  
34  
35
- 36 3. Torgerson DJ, Bell-Syer SE. - Hormone replacement therapy and prevention  
37 of nonvertebral fractures: a meta-analysis of randomized trials. JAMA, 2001.  
38 **285**(22): p. 2891-7.  
39  
40
- 41 4. Spector TD, Nandra D, Hart DJ, et al. - Is hormone replacement therapy  
42 protective for hand and knee osteoarthritis in women?: The Chingford Study.  
43 Ann Rheum Dis, 1997. **56**(7): p. 432-4.  
44  
45
- 46 5. Sandmark H, Hogstedt C, Lewold S, et al. - Osteoarthrosis of the knee in men  
47 and women in association with overweight, smoking, and hormone therapy.  
48 Ann Rheum Dis, 1999. **58**(3): p. 151-5.  
49  
50  
51  
52  
53  
54  
55  
56  
57  
58  
59  
60

- 1  
2  
3  
4 6. Schmidt IU, Wakley GK, Turner RT. - Effects of estrogen and progesterone on  
5  
6  
7  
8  
9  
10  
11  
12  
13  
14  
15  
16  
17  
18  
19  
20  
21  
22  
23  
24  
25  
26  
27  
28  
29  
30  
31  
32  
33  
34  
35  
36  
37  
38  
39  
40  
41  
42  
43  
44  
45  
46  
47  
48  
49  
50  
51  
52  
53  
54  
55  
56  
57  
58  
59  
60  
6. Schmidt IU, Wakley GK, Turner RT. - Effects of estrogen and progesterone on  
tibia histomorphometry in growing rats. *Calcif Tissue Int*, 2000. **67**(1): p. 47-52.
7. Dietrich W, Haitel A, Holzer G, et al. - Estrogen receptor-beta is the  
predominant estrogen receptor subtype in normal human synovia. *J Soc  
Gynecol Investig*, 2006. **13**(7): p. 512-7.
8. Sniekers YH, Weinans H, Bierma-Zeinstra SM, et al. - Animal models for  
osteoarthritis: the effect of ovariectomy and estrogen treatment - a systematic  
approach. *Osteoarthritis Cartilage*, 2008. **16**(5): p. 533-41.
9. Kellgren JH, Lawrence JS. - Radiological assessment of osteo-arthrosis. *Ann  
Rheum Dis*, 1957. **16**(4): p. 494-502.
10. Felson DT, Zhang Y, Hannan MT, N, et al. - The incidence and natural history  
of knee osteoarthritis in the elderly. The Framingham Osteoarthritis Study.  
*Arthritis Rheum*, 1995. **38**(10): p. 1500-5.
11. Brouwer GM, van Tol AW, Bergink AP, et al. - Association between valgus and  
varus alignment and the development and progression of radiographic  
osteoarthritis of the knee. *Arthritis Rheum*, 2007. **56**(4): p. 1204-11.
12. Lawrence JS, Bremner JM, Bier F. - Osteo-arthrosis. Prevalence in the  
population and relationship between symptoms and x-ray changes. *Ann  
Rheum Dis*, 1966. **25**(1): p. 1-24.
13. Wilson MG, Michet CJ Jr, Ilstrup DM, et al. - Idiopathic symptomatic  
osteoarthritis of the hip and knee: a population-based incidence study. *Mayo  
Clin Proc*, 1990. **65**(9): p. 1214-21.
14. McAlindon TE, Snow S, Cooper C, Dieppe PA. - Radiographic patterns of  
osteoarthritis of the knee joint in the community: the importance of the  
patellofemoral joint. *Ann Rheum Dis*, 1992. **51**(7): p. 844-9.

- 1  
2  
3  
4 15. Anderson GL, Limacher M, Assaf AR, et al. - Effects of conjugated equine  
5 estrogen in postmenopausal women with hysterectomy: the Women's Health  
6 Initiative randomized controlled trial. *JAMA*, 2004. **291**(14): p. 1701-12.  
7  
8
- 9  
10  
11 16. Ham KD, Loeser RF, Lindgren BR, et al. - Effects of long-term estrogen  
12 replacement therapy on osteoarthritis severity in cynomolgus monkeys.  
13 *Arthritis Rheum*, 2002. **46**(7): p. 1956-64.  
14
- 15  
16  
17 17. Yang JH, Kim JH, Lim DS, et al. - Effect of combined sex hormone  
18 replacement on bone/cartilage turnover in a murine model of osteoarthritis.  
19 *Clin Orthop Surg*, 2012. **4**(3): p. 234-41.  
20  
21
- 22  
23  
24 18. Calvo E, Castañeda S, Largo R, et al. - Osteoporosis increases the severity of  
25 cartilage damage in an experimental model of osteoarthritis in rabbits.  
26 *Osteoarthritis Cartilage*, 2007. **15**(1): p. 69-77.  
27  
28
- 29  
30  
31 19. Arts J, Kuiper GG, Janssen JM, et al. - Differential expression of estrogen  
32 receptors alpha and beta mRNA during differentiation of human osteoblast  
33 SV-HFO cells. *Endocrinology*, 1997. **138**(11): p. 5067-70.  
34  
35
- 36  
37  
38 20. Høegh-Andersen P, Tankó LB, Andersen TL, et al. - Ovariectomized rats as a  
39 model of postmenopausal osteoarthritis: validation and application. *Arthritis*  
40 *Res Ther*, 2004. **6**(2): p. 19.  
41  
42
- 43  
44 21. Räsänen T, Messner K. - Articular cartilage compressive stiffness following  
45 oophorectomy or treatment with 17beta-estradiol in young postpubertal  
46 rabbits. *Acta Obstet Gynecol Scand*, 1999. **78**(5): p. 357-62.  
47  
48
- 49  
50  
51 22. Yoshioka T, Sato B, Matsumoto K, et al. - Steroid receptors in osteoblasts.  
52 *Clin Orthop Relat Res*, 1980. **148**: p. 297-303.  
53  
54
- 55  
56  
57 23. Hart DJ, Spector TD. - Cigarette smoking and risk of osteoarthritis in women  
58 in the general population: the Chingford study. *Ann Rheum Dis*, 1993. **52**(2): p.  
59  
60

- 1  
2  
3  
4 93-6.  
5  
6 24. Pearce F, Hui M, Ding C, et al. - Does smoking reduce the progression of  
7 osteoarthritis? Meta-analysis of observational studies. *Arthritis Care Res*,  
8 2013. **65**(7): p. 1026-33.  
9  
10  
11  
12 25. Mnatzaganian G, Ryan P, Reid CM, et al. - Smoking and primary total hip or  
13 knee replacement due to osteoarthritis in 54,288 elderly men and women.  
14 *BMC Musculoskelet Disord*, 2013. **14**(262): p. 1471-2474.  
15  
16  
17 26. Schouten JS, van den Ouweland FA, Valkenburg HA. - A 12 year follow up  
18 study in the general population on prognostic factors of cartilage loss in  
19 osteoarthritis of the knee. *Ann Rheum Dis*, 1992. **51**(8): p. 932-7.  
20  
21  
22 27. Gullahorn L, Lippiello L, Karpman R. - Smoking and osteoarthritis: differential  
23 effect of nicotine on human chondrocyte glycosaminoglycan and collagen  
24 synthesis. *Osteoarthritis Cartilage*, 2005. **13**(10): p. 942-3.  
25  
26  
27 28. Davies-Tuck ML, Wluka AE, Forbes A, et al. - Smoking is associated with  
28 increased cartilage loss and persistence of bone marrow lesions over 2 years  
29 in community-based individuals. *Rheumatology*, 2009. **48**(10): p. 1227-31.  
30  
31  
32  
33  
34  
35  
36  
37  
38  
39  
40  
41  
42  
43  
44  
45  
46  
47  
48  
49  
50  
51  
52  
53  
54  
55  
56  
57  
58  
59  
60

**Table 1.** Parameter comparison between spine OA patients and the control group.

|                                 | No Osteoarthritis |             | Osteoarthritis |             | P-value           |
|---------------------------------|-------------------|-------------|----------------|-------------|-------------------|
|                                 | N                 | %           | N              | %           |                   |
| <b>Smoking</b>                  | 154               | 6.1% (0.6)  | 38             | 4.5% (0.9)  | 0.1340            |
| <b>Drinking (heavy)</b>         | 15                | 0.5% (0.2)  | 3              | 0.3% (0.2)  | 0.4693            |
| <b>High activity</b>            | 527               | 15.1% (0.8) | 104            | 12.1% (1.3) | 0.0608            |
| <b>Urban residence</b>          | 2410              | 71.0% (2.4) | 639            | 69.6% (3.0) | 0.5131            |
| <b>With spouse</b>              | 2262              | 67.7% (1.1) | 547            | 58.3% (2.1) | <b>&lt;0.0001</b> |
| <b>High education</b>           | 788               | 22.0% (1.0) | 150            | 14.7% (1.5) | <b>&lt;0.0001</b> |
| <b>Low income</b>               | 1181              | 33.9% (1.1) | 378            | 42.8% (2.0) | <b>&lt;0.0001</b> |
| <b>Contraceptive</b>            | 760               | 21.2% (0.9) | 202            | 21.6% (1.6) | 0.8115            |
| <b>HRT</b>                      | 503               | 13.5% (0.7) | 85             | 8.2% (1.1)  | <b>0.0002</b>     |
| <b>BMI <math>\geq 25</math></b> | 1246              | 24.2% (0.1) | 336            | 24.4% (0.1) | 0.0593            |
| <b>WC <math>\geq 85</math></b>  | 2018              | 82.3% (0.2) | 542            | 83.0% (0.3) | 0.0673            |

An age-adjusted logistic regression model was used.

( $P < 0.05$  indicated statistical significance; ()): standard error)

N: Absolute number in a group

BMI: Body mass index ( $\text{kg}/\text{m}^2$ )

WC: Waist circumference (cm)

**Table 2.** Risk analysis of spine OA with other related factors.

|                                 | OR    | 95% CI      | P-value           |
|---------------------------------|-------|-------------|-------------------|
| <b>Age (per 5 y)</b>            | 1.257 | 1.194–1.323 | <b>&lt;0.0001</b> |
| <b>Smoking</b>                  | 0.711 | 0.454–1.114 | 0.1367            |
| <b>Drinking (heavy)</b>         | 0.853 | 0.220–3.308 | 0.8182            |
| <b>High activity</b>            | 0.892 | 0.676–1.178 | 0.4197            |
| <b>Urban residence</b>          | 1.077 | 0.870–1.332 | 0.4960            |
| <b>With spouse</b>              | 1.031 | 0.837–1.269 | 0.7746            |
| <b>High education</b>           | 0.912 | 0.693–1.201 | 0.5127            |
| <b>Low income</b>               | 0.999 | 0.816–1.222 | 0.9889            |
| <b>Contraceptive</b>            | 1.037 | 0.838–1.283 | 0.7359            |
| <b>HRT</b>                      | 0.717 | 0.527–0.976 | <b>0.0344</b>     |
| <b>BMI <math>\geq 25</math></b> | 1.094 | 0.926–1.291 | 0.2920            |
| <b>WC <math>\geq 85</math></b>  | 0.975 | 0.811–1.172 | 0.7884            |

An age-adjusted logistic regression model was used.  
(P<0.05 indicated statistical significance; ()): standard error)

**Table 3.** Prevalence and risk analysis for spine OA with smoking in the HRT group.

|            | Nonsmokers |             | Smokers |                    | P-value      |
|------------|------------|-------------|---------|--------------------|--------------|
|            | N          | %           | N       | %                  |              |
|            | 475        | 83.5% (1.8) | 17      | 98.4% (1.7)        | <b>0.025</b> |
| <b>Odd</b> |            | 1           |         | 11.32 (1.31–17.90) | <b>0.027</b> |

Age, BMI, WC, drinking, and exercise were adjusted.

(P<0.05 indicated statistical significance; ()): standard error, 95% CI)

**Table 4.** The prevalence of hormone therapy according to spinal pain and radiographic OA.

| OA             | No HRT |             | HRT |             | P-value           |
|----------------|--------|-------------|-----|-------------|-------------------|
|                | N      | %           | N   | %           |                   |
| <b>Grade 0</b> | 696    | 19.8% (1.0) | 184 | 30.2% (2.4) | <b>&lt;0.0001</b> |
| <b>Grade 1</b> | 1454   | 40.8% (1.0) | 253 | 46.5% (2.5) |                   |
| <b>Grade 2</b> | 1527   | 39.4% (1.1) | 151 | 23.3% (2.1) |                   |
| <b>Sx</b>      | 1302   | 34.7% (1.1) | 162 | 26.0% (2.2) | <b>0.0005</b>     |
| <b>OA + Sx</b> | 819    | 21.0% (1.1) | 85  | 13.1% (2.1) | <b>&lt;0.0001</b> |

An age-adjusted logistic regression model was used.

(P<0.05 indicated statistical significance; ()): standard error)

OA: Participants with only radiological findings;

Sx: Respondents with only symptoms;

OA+Sx: Patients with both symptoms and radiological findings.



**Table 5.** Risk analysis of spine OA with hormone therapy.

| HRT            | OR    | 95% CI      | P-value      |
|----------------|-------|-------------|--------------|
| <b>OA</b>      | 0.723 | 0.563–0.929 | <b>0.011</b> |
| <b>Sx</b>      | 0.916 | 0.723–1.159 | 0.464        |
| <b>OA + Sx</b> | 0.717 | 0.527–0.976 | <b>0.034</b> |

An age-adjusted logistic regression model was used.

(P<0.05 indicated statistical significance; ()): standard error)

OA: Participants with only radiological findings;

Sx: Patients with only symptoms;

OA+Sx: Respondents with both symptoms and radiological findings.

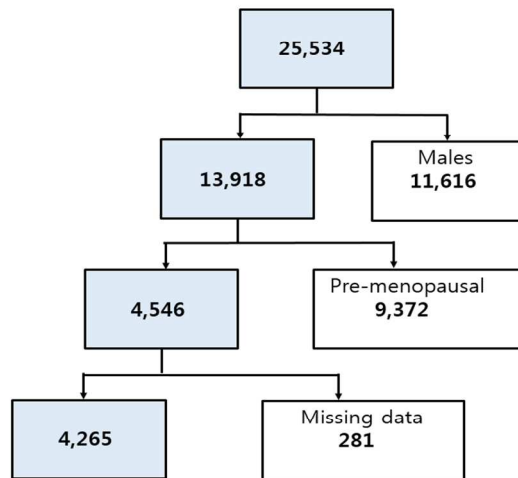

331x203mm (147 x 135 DPI)

review only

## STROBE Statement

Checklist of items that should be included in reports of observational studies

| Section/Topic            | Item No | Recommendation                                                                                                                                                                             | Reported on Page No |
|--------------------------|---------|--------------------------------------------------------------------------------------------------------------------------------------------------------------------------------------------|---------------------|
| Title and abstract       | 1       | (a) Indicate the study's design with a commonly used term in the title or the abstract                                                                                                     | 2                   |
|                          |         | (b) Provide in the abstract an informative and balanced summary of what was done and what was found                                                                                        | 2                   |
| <b>Introduction</b>      |         |                                                                                                                                                                                            |                     |
| Background/rationale     | 2       | Explain the scientific background and rationale for the investigation being reported                                                                                                       | 3                   |
| Objectives               | 3       | State specific objectives, including any prespecified hypotheses                                                                                                                           | 3                   |
| <b>Methods</b>           |         |                                                                                                                                                                                            |                     |
| Study design             | 4       | Present key elements of study design early in the paper                                                                                                                                    | 4                   |
| Setting                  | 5       | Describe the setting, locations, and relevant dates, including periods of recruitment, exposure, follow-up, and data collection                                                            | 4                   |
|                          |         | (a) <i>Cohort study</i> —Give the eligibility criteria, and the sources and methods of selection of participants. Describe methods of follow-up                                            |                     |
| Participants             | 6       | <i>Case-control study</i> —Give the eligibility criteria, and the sources and methods of case ascertainment and control selection. Give the rationale for the choice of cases and controls | 4-6                 |
|                          |         | <i>Cross-sectional study</i> —Give the eligibility criteria, and the sources and methods of selection of participants                                                                      |                     |
| Variables                | 7       | (b) <i>Cohort study</i> —For matched studies, give matching criteria and number of exposed and unexposed                                                                                   | 4-6                 |
|                          |         | <i>Case-control study</i> —For matched studies, give matching criteria and the number of controls per case                                                                                 |                     |
| Data sources/measurement | 8*      | Clearly define all outcomes, exposures, predictors, potential confounders, and effect modifiers. Give diagnostic criteria, if applicable                                                   | 4-6                 |
| Bias                     | 9       | For each variable of interest, give sources of data and details of methods of assessment (measurement). Describe comparability of assessment methods if there is more than one group       | 4                   |
| Study size               | 10      | Describe any efforts to address potential sources of bias                                                                                                                                  | 4-6                 |
| Quantitative variables   | 11      | Explain how the study size was arrived at                                                                                                                                                  | 4                   |
|                          |         | Explain how quantitative variables were handled in the analyses. If applicable, describe which groupings were chosen and why                                                               | 5-6                 |
| Statistical methods      | 12      | (a) Describe all statistical methods, including those used to control for confounding                                                                                                      | 4-6                 |
|                          |         | (b) Describe any methods used to examine subgroups and interactions                                                                                                                        | 4-6                 |
|                          |         | (c) Explain how missing data were addressed                                                                                                                                                | 4-6                 |
|                          |         | (d) <i>Cohort study</i> —If applicable, explain how loss to follow-up was addressed                                                                                                        |                     |
|                          |         | <i>Case-control study</i> —If applicable, explain how matching of cases and controls was addressed                                                                                         | 4-6                 |
|                          |         | <i>Cross-sectional study</i> —If applicable, describe analytical methods taking account of sampling strategy                                                                               |                     |
|                          |         | (e) Describe any sensitivity analyses                                                                                                                                                      | 4-6                 |

| Section/Topic            | Item No | Recommendation                                                                                                                                                                                               | Reported on Page No |
|--------------------------|---------|--------------------------------------------------------------------------------------------------------------------------------------------------------------------------------------------------------------|---------------------|
| <b>Results</b>           |         |                                                                                                                                                                                                              |                     |
| Participants             | 13*     | (a) Report numbers of individuals at each stage of study—eg numbers potentially eligible, examined for eligibility, confirmed eligible, included in the study, completing follow-up, and analysed            | 7                   |
|                          |         | (b) Give reasons for non-participation at each stage                                                                                                                                                         | 7                   |
|                          |         | (c) Consider use of a flow diagram                                                                                                                                                                           | 7                   |
| Descriptive data         | 14*     | (a) Give characteristics of study participants (eg demographic, clinical, social) and information on exposures and potential confounders                                                                     | 7                   |
|                          |         | (b) Indicate number of participants with missing data for each variable of interest                                                                                                                          | 7                   |
|                          |         | (c) <i>Cohort study</i> —Summarise follow-up time (eg, average and total amount)                                                                                                                             | 7                   |
| Outcome data             | 15*     | <i>Cohort study</i> —Report numbers of outcome events or summary measures over time                                                                                                                          | 7                   |
|                          |         | <i>Case-control study</i> —Report numbers in each exposure category, or summary measures of exposure                                                                                                         | 7                   |
|                          |         | <i>Cross-sectional study</i> —Report numbers of outcome events or summary measures                                                                                                                           | 7                   |
| Main results             | 16      | (a) Give unadjusted estimates and, if applicable, confounder-adjusted estimates and their precision (eg, 95% confidence interval). Make clear which confounders were adjusted for and why they were included | 7                   |
|                          |         | (b) Report category boundaries when continuous variables were categorized                                                                                                                                    | 7                   |
|                          |         | (c) If relevant, consider translating estimates of relative risk into absolute risk for a meaningful time period                                                                                             | 7                   |
| Other analyses           | 17      | Report other analyses done—eg analyses of subgroups and interactions, and sensitivity analyses                                                                                                               | 7                   |
| <b>Discussion</b>        |         |                                                                                                                                                                                                              |                     |
| Key results              | 18      | Summarise key results with reference to study objectives                                                                                                                                                     | 8                   |
| Limitations              | 19      | Discuss limitations of the study, taking into account sources of potential bias or imprecision. Discuss both direction and magnitude of any potential bias                                                   | 10                  |
| Interpretation           | 20      | Give a cautious overall interpretation of results considering objectives, limitations, multiplicity of analyses, results from similar studies, and other relevant evidence                                   | 9                   |
| Generalisability         | 21      | Discuss the generalisability (external validity) of the study results                                                                                                                                        | 8-11                |
| <b>Other Information</b> |         |                                                                                                                                                                                                              |                     |
| Funding                  | 22      | Give the source of funding and the role of the funders for the present study and, if applicable, for the original study on which the present article is based                                                | 12                  |

\*Give information separately for cases and controls in case-control studies and, if applicable, for exposed and unexposed groups in cohort and cross-sectional studies.

**Note:** An Explanation and Elaboration article discusses each checklist item and gives methodological background and published examples of transparent reporting. The STROBE checklist is best used in conjunction with this article (freely available on the Web sites of PLoS Medicine at <http://www.plosmedicine.org/>, Annals of Internal Medicine at <http://www.annals.org/>, and Epidemiology at <http://www.epidem.com/>). Information on the STROBE Initiative is available at [www.strobe-statement.org](http://www.strobe-statement.org).

# BMJ Open

**The relationship between hormone replacement therapy  
and spinal osteoarthritis  
: A nationwide health survey analysis of the elderly Korean  
population**

|                                    |                                                                                                                                                                                                                                                                                                              |
|------------------------------------|--------------------------------------------------------------------------------------------------------------------------------------------------------------------------------------------------------------------------------------------------------------------------------------------------------------|
| Journal:                           | <i>BMJ Open</i>                                                                                                                                                                                                                                                                                              |
| Manuscript ID                      | bmjopen-2017-018063.R1                                                                                                                                                                                                                                                                                       |
| Article Type:                      | Research                                                                                                                                                                                                                                                                                                     |
| Date Submitted by the Author:      | 15-Sep-2017                                                                                                                                                                                                                                                                                                  |
| Complete List of Authors:          | Park, Jung-Ho; Department of Orthopedics<br>Hong, Jae-Young; Department of Orthopedics<br>Han, Kyungdo; College of Medicine, Catholic University<br>Han, Seung-Woo; Department of Orthopedics<br>Chun, Eun Mi; Ewha Woman's University Mokdong Hospital, Division of<br>Pulmonary and Critical Care Medicine |
| <b>Primary Subject<br>Heading</b>: | Rheumatology                                                                                                                                                                                                                                                                                                 |
| Secondary Subject Heading:         | Epidemiology, Public health                                                                                                                                                                                                                                                                                  |
| Keywords:                          | osteoarthritis, Spine < ORTHOPAEDIC & TRAUMA SURGERY, hormone<br>replacement therapy                                                                                                                                                                                                                         |
|                                    |                                                                                                                                                                                                                                                                                                              |

SCHOLARONE™  
Manuscripts

**Title:**

**The relationship between hormone replacement therapy and spinal osteoarthritis: A nationwide health survey analysis of the elderly Korean population**

**Authors:**

**Jung-Ho Park,<sup>1</sup> MD, PhD; Jae-Young Hong,<sup>1</sup> MD, PhD; Kyungdo Han,<sup>2</sup> PhD; Seung-Woo Han,<sup>1</sup> MD; Eun Mi Chun,<sup>3</sup> MD, PhD.**

**From**

<sup>1</sup> Department of Orthopedics, Korea University Ansan Hospital, Ansan, South Korea

<sup>2</sup> Department of Biostatistics, College of Medicine, Catholic University, Seoul, South Korea

<sup>3</sup> Division of Pulmonary and Critical Care Medicine, Department of Internal Medicine, Ewha Woman's University Mokdong Hospital, Seoul South Korea

**Corresponding Author:**

**Jae-Young Hong;** Department of Orthopedics, Korea University Ansan Hospital, Gojan Dong, Danwon Gu, Ansan 425-707, South Korea

Ph: +82-31-412-6577 Fax: +82-31-487-9502

Email: osspine@korea.ac.kr

## Abstract

### Objectives

To identify the effects of hormone replacement therapy (HRT) on spinal osteoarthritis (OA).

### Methods and design

A cross-sectional study of a nationwide survey was performed.

### Setting

This study collected data from the fifth Korean National Health and Nutrition Examination Survey (KNHANES V-5; 2010–2012).

### Participants

After excluding ineligible respondents, the total number of participants in this study was 4,265 females. All participants reported symptoms and disabilities related to spinal OA. In addition, plain radiographs of the spine were taken of all patients.

### Primary and secondary outcome measures

Demographic and lifestyle variables were compared between the HRT and non-HRT groups. In addition, radiographic examination and symptom assessment were performed to determine the existence of spinal OA.

### Results

Demographic factors, marital status, education, income, and HRT all correlated with a decrease in spinal OA morbidity. A risk analysis of related factors showed that HRT and age had significant effects on spinal OA (odds ratios: 0.717 and 1.257,  $P < 0.05$ ). Nevertheless, in the HRT group, smokers had a significantly increased risk of spinal OA ( $P < 0.05$ ). In addition, the HRT group demonstrated a lower prevalence of spinal OA. The calculated risk for compromised morbidity with HRT compared to the

1  
2  
3  
4 prevalence of spinal OA was 0.717 (odds ratio). The duration of HRT was also  
5  
6 related to the risk for spinal OA. The group that had been taking HRT for more than  
7  
8 one year showed significantly decreased risk (odds ratio: 0.686) compared to  
9  
10 patients with less than one year of HRT (odds ratio: 0.744; P<0.05).  
11  
12

### 13 **Conclusion**

14  
15 Women receiving HRT showed a significantly lower prevalence of spinal OA. HRT  
16  
17 also correlated with a decrease in spinal OA morbidity.  
18  
19

20  
21 **Key words:** Osteoarthritis, Spine, Hormone replacement therapy  
22  
23  
24  
25  
26  
27  
28  
29  
30  
31  
32  
33  
34  
35  
36  
37  
38  
39  
40  
41  
42  
43  
44  
45  
46  
47  
48  
49  
50  
51  
52  
53  
54  
55  
56  
57  
58  
59  
60



## Strength and limitations of this study

-This study analyzed a large cross-sectional population and used sophisticated statistical methods, which could enhance the significance of the results.

-The study included analysis of demographic and lifestyle variables as well as radiographic examinations and symptom assessment, which could enhance the significance of the results.

-The cross-sectional study design precluded establishment of a causal relationship between HRT and OA.

-More sophisticated diagnostic tools, such as magnetic resonance imaging or computed tomography, might be needed to evaluate the precise status of patient joints.

-The prevalence or etiology of OA could also be influenced by ethnic or environmental factors, which could decrease the generalizability of our results.

## Introduction

Menopause is a particularly influential period during which women adapt to a new biological state. Women in the postmenopausal period tend to have low estradiol and serotonin concentrations and a high level of follicle stimulating hormone.[1-4] Hormone replacement therapy (HRT) has shown several benefits for elderly females because it minimizes symptoms related to estrogen deficiency.[1,3-8] However, few studies have investigated the effects of hormone therapy on the musculoskeletal system. Imada et al. performed a case-control study of the influence of oophorectomy on the development of degenerative spondylolisthesis. They reported that the abrupt decrease in estradiol level caused by oophorectomy could be a predisposing factor in degenerative spondylolisthesis at L4/5.[9] Recently, more people have begun experiencing degenerative osteoarthritis (OA), which can occur in several mobile joints of the body, including the spine. We hypothesized that HRT might prevent the onset of degenerative spinal disease and therefore might contribute to the prevention of low back pain.[10] The objective of this study was to estimate the associations between hormonal factors and spinal OA in a Korean population. We analyzed a large cross-sectional population using data from the Korea National Health and Nutrition Examination Survey (KNHANES) to determine the relationship between HRT and spinal OA.

## Methods

### Study population

The study design was cross-sectional, using three years of data from KNHANES-V (2010–2012), a nationwide health and nutrition survey that is conducted regularly. The number of participants who completed both the health interview and health examination surveys was 25,534 (Figure 1). We excluded men (n=11,616), premenopausal women (n=9,372) and those with missing data for variables included in the analysis (n=281). The remaining 4,265 participants underwent physical and laboratory examinations, including a radiographic examination of the spine. In addition, health interview data were retrieved, including demographic and lifestyle variables. All participants provided informed consent, and the Korea Centers for Disease Control and Prevention Institutional Review Board approved this study (2010-02CON-21-C, 2011-02CON-06-C, 2012-01EXP-01-2C).

### Radiographic examination and symptom assessment

Anteroposterior and lateral plain radiographic examinations of the lumbar spine were taken using a SD3000 Synchro Stand (Accele Ray, Switzerland). Radiographic changes in each joint were independently assessed by two radiologists using the Kellgren/Lawrence (KL) grading system as follows: Grade 0, no visible features of OA, doubtful/questionable osteophytes; Grade 1, minimal, definitive small osteophytes; and Grade 2, definitive moderate osteophytes or subchondral bone cysts and sclerosis with or without foraminal stenosis.[11] The presence of radiographic OA was defined as a KL grade of 2 or more. If the grades given by the two radiologists differed, the higher grade was accepted. The concordance rate for

1  
2  
3  
4 KL grades within one grade for the same case was 94.76%. In addition, all patients  
5 described their joint-related symptoms (e.g., spine), and those symptoms were  
6 scored. Participants who reported experiencing arthritic pain for more than one of the  
7 past three months were asked to report the pain intensity using a numeric rating  
8 scale (NRS) ranging from 0–10, regardless of whether they used medication.  
9  
10  
11  
12  
13  
14  
15  
16

### 17 **Demographic and lifestyle variables**

18  
19 HRT was defined as use of more than one year of regular hormone medication.  
20  
21 Exogenous hormone-related factors included oral contraceptive (OC) use duration  
22 and HRT starting age and duration. Demographic variables were age, gender,  
23 monthly household income, marital status, current residence, education level,  
24 smoking status (never smoker, past smoker, or current smoker), alcohol  
25 consumption (g/d), and physical activity (low, moderate, or high). Household income  
26 was calculated as the monthly household income divided by the square root of the  
27 number of members. Education was classified by years of schooling (<6 years, 7–9  
28 years, 10–12 years, and >12 years). Marital status was stratified into three groups:  
29 never married, married and living with spouse, and divorced/widowed. Respondents  
30 who had smoked more than 100 cigarettes in their lifetime were classified as  
31 smokers and placed into the smoker group. Physical activity was quantified  
32 according to the Korean version of the International Physical Activity Questionnaire.  
33  
34 Body weight and height were obtained, and the body mass index was calculated by  
35 dividing the body weight in kg by the height<sup>2</sup> in m<sup>2</sup>. Waist circumference was  
36 measured between the lower costal margin and the iliac crest. We defined obesity as  
37 a body mass index  $\geq 25$ .  
38  
39  
40  
41  
42  
43  
44  
45  
46  
47  
48  
49  
50  
51  
52  
53  
54  
55  
56  
57  
58  
59  
60

### Statistical analyses

Statistical analyses were conducted using SAS survey procedures (version 9.3; SAS Institute, Cary, NC, US) in a manner that reflected the sampling weights and provided nationally representative estimates. The characteristics of patients with spinal OA were compared with those of participants without spinal OA using two independent sample *t*-tests, a one-way analysis of variance for continuous variables, and Chi-square tests for categorical variables. Multivariate logistic regression analyses were conducted to investigate the relationships between parameters.

## Results

### The relationships between demographic factors and spinal OA

We defined spinal OA as definite osteoarthritis on plain radiographs with related spinal pain. The mean age of the study population was  $64.3 \pm 0.2$  (50–94) years. The total numbers of participants with spinal OA and HRT were 904 and 588, respectively, out of 4,265 total participants. We found no spinal OA in 3,361 participants, regardless of HRT status. In terms of demographic factors, marital status, education, income, and HRT correlated with a decrease in spinal OA morbidity (Table 1). A risk analysis of related factors showed that HRT had significant effects on spinal OA (odds ratio (OR): 0.717, Table 2). However, in the HRT group, smokers showed a significantly increased risk of spinal OA (OR: 11.3) compared to nonsmokers (Table 3).

### Relationship between HRT and spinal OA

The HRT group had a lower prevalence of spinal OA. In addition, the spinal OA group showed a significantly lower rate of HRT (Table 4). Calculated risks for compromised morbidity were 0.717 (OR) compared to the control group (Table 5). The solitary radiographic spinal OA and solitary symptom groups also showed a lower percentage of HRT than controls (OR: 0.723 and 0.916, respectively); however, the radiographic OA plus symptom group had the lowest percentage of HRT and significantly higher morbidity (OR: 0.717). The duration of HRT was also related to the risk of spinal OA: the >1 year of medication group had a significantly decreased

1  
2  
3  
4 risk (OR: 0.686) compared to the <1 year of medication group (OR: 0.840).  
5  
6  
7  
8  
9

## 10 11 **Discussion**

12  
13  
14 Osteoarthritis involves degenerative changes in soft tissue, subchondral bone, and  
15  
16 hyaline cartilage that lead to serious joint disability.[5,12-16] Estrogen deficiency is  
17  
18 related to the occurrence and progression of OA. Beginning in early menopause, the  
19  
20 number of women who suffer from OA increases dramatically.[1-6,12,17,18] The  
21  
22 association between estrogen and OA has been verified in a murine model, and  
23  
24 research on both estrogen deficiency and complement in articular cartilage has been  
25  
26 conducted in animal models.[19] In many experimental animal studies, ovariectomy  
27  
28 was reported to induce OA, whereas estrogen complement delayed cartilage  
29  
30 degeneration.[6,8,20-23] Estrogens act on estrogen receptors distributed throughout  
31  
32 the articular cartilage, synovial membrane, and ligaments and are thought to be  
33  
34 related to degenerative changes. In addition, Gruber et al. suggested the expression  
35  
36 and localization of estrogen receptor-beta in the annulus cells of human  
37  
38 intervertebral discs. They provided evidence of ER beta gene expression in human  
39  
40 intervertebral disc cells in vivo and in vitro. Culturing annulus cells in the presence of  
41  
42 17-beta-estradiol significantly increased cell proliferation.[24] Baron et al.  
43  
44 investigated the effects of menopause and HRT on the intervertebral discs and  
45  
46 reported that estrogen-replete women appear to maintain higher intervertebral discs  
47  
48 than untreated post-menopausal women.[25] Moreover, patients receiving long-term  
49  
50 HRT have a lower risk of knee and hip OA on plain radiographs than women who do  
51  
52 not take HRT.[2,3,5,15,19]  
53  
54  
55  
56  
57  
58  
59  
60

1  
2  
3  
4  
5  
6 In this study, age, marital status, education level, and income all significantly  
7 correlated with OA morbidity. However, BMI and body composition factors were not  
8 associated with spinal OA. Previous studies have reported that joint pain is  
9 associated with several socio-demographic factors, such as gender, advanced age,  
10 low education level, smoking, and occupation.[10,14] In particular, we found  
11 significant relationships between factors in the female group and higher prevalence  
12 of OA. It appears that the female population is more prone to OA, and this  
13 association could be related to hormonal influences, especially in an elderly  
14 population. Wang et al. reported increased low back pain prevalence in females than  
15 males, especially after menopause. They reported that higher low back pain  
16 prevalence in school age girls compared to school age boys is likely caused by  
17 psychological factors, female hormone fluctuation, and menstruation. Compared with  
18 young and middle-aged subjects, a further increase in low back pain prevalence in  
19 females compared with males was noted after menopause.[26] In our study, the HRT  
20 group showed a significantly lower prevalence of spinal OA. We therefore assume  
21 that HRT can influence the prevalence of spinal OA. We found a positive, long-term  
22 effect of HRT, suggesting that estrogen deficiency could be a cause of OA and  
23 highlighting the need for further studies on the effects of estrogen on cartilage and  
24 bone. Although we could not determine cause and effect relationships, HRT might  
25 prevent OA. We hypothesized that HRT has a protective effect on the development  
26 of spinal OA. In accordance with our hypothesis, both spinal pain and prevalence of  
27 radiographic spinal OA were lower in the HRT group. The duration of hormonal  
28 therapy also showed a significant relationship with prevalence of spinal OA, which  
29 suggests the importance of continuous HRT in elderly females.  
30  
31  
32  
33  
34  
35  
36  
37  
38  
39  
40  
41  
42  
43  
44  
45  
46  
47  
48  
49  
50  
51  
52  
53  
54  
55  
56  
57  
58  
59  
60



1  
2  
3  
4  
5  
6 In the present study, smoking was not significantly related to spinal OA morbidity, but  
7  
8 it was correlated with an increased prevalence of spinal OA, especially in the HRT  
9  
10 group. However, the association between the risk of OA and smoking is still unclear.  
11  
12 Some studies have reported that smoking is a protective factor against severe OA. In  
13  
14 contrast, observational studies have concluded that smoking has no protective effect  
15  
16 on the progression of OA.[7,25,27-33] In any case, smokers prescribed HRT showed  
17  
18 a significantly increased risk of OA compared to nonsmokers taking HRT, even  
19  
20 though the use of HRT had an overall protective effect against OA. These data show  
21  
22 that smoking could have a hazardous effect on joint cartilage that could eliminate the  
23  
24 protective effect of HRT for OA.  
25  
26  
27  
28  
29

30  
31 This study has several limitations. First, the cross-sectional study design prevented  
32  
33 us from establishing causal relationships between HRT and OA. In this study, we  
34  
35 could not match the OA site and spinal pain origin. We used a cross-sectional  
36  
37 nationwide health survey with a brief health interview regarding pain related to each  
38  
39 joint (e.g., hip, knee, and spine). Therefore, we could not clarify the relationship  
40  
41 between spinal OA and pain with a spinal origin. Future prospective studies will be  
42  
43 required to determine causal relationships. Second, the use of a single 11-point NRS  
44  
45 did not allow us to evaluate the exact intensity of the respondents' acute and chronic  
46  
47 pain, including functional impairment. In addition, more sophisticated diagnostic tools,  
48  
49 such as magnetic resonance imaging or computed tomography, might be needed to  
50  
51 evaluate the precise status of patient joints. Third, the prevalence and etiology of OA  
52  
53 might be influenced by ethnic or environmental factors, which could decrease the  
54  
55 generalizability of our study. In addition, the relatively small number of smokers in the  
56  
57  
58  
59  
60

1  
2  
3  
4 HRT group could dilute the significance of that result. Despite these limitations, our  
5  
6 study analyzed a large cross-sectional population and used sophisticated statistical  
7  
8 methods. We found a significantly lower prevalence of spinal OA in patients receiving  
9  
10 HRT. We believe that our results will be helpful to physicians treating OA  
11  
12

13  
14  
15 In conclusion, populations receiving HRT showed a significantly lower prevalence of  
16  
17 spinal OA, and the duration of HRT was significantly related to spinal OA prevalence.  
18  
19  
20  
21  
22  
23  
24  
25  
26  
27  
28  
29  
30  
31  
32  
33  
34  
35  
36  
37  
38  
39  
40  
41  
42  
43  
44  
45  
46  
47  
48  
49  
50  
51  
52  
53  
54  
55  
56  
57  
58  
59  
60

## Figure legends

### Figure 1

A flow chart showing the inclusion and exclusion of participants according to study criteria.

## Author contributions

All authors made substantial contributions to sections (1), (2), and (3) as described below:

- (1) Study conception and design, data acquisition, and data analysis and interpretation- **JHP, JYH**
- (2) Drafting of the manuscript or revising it critically for important intellectual content- **KDH, SWH**
- (3) Final approval of the version to be submitted- **EMC, JYH**

## Conflict of interest

There are no conflicts of interest to report.

## Funding

This study was not supported by any fund or grant.

## Data sharing statement

Fifth Korean National Health and Nutrition Examination Survey (KNHANES-V: 2010–2012) data are available to any researchers under approval of an IRB.

## References

1. Effects of hormone therapy on bone mineral density: results from the postmenopausal estrogen/progestin interventions (PEPI) trial. The Writing Group for the PEPI. JAMA, 1996. **276**(17): p. 1389-96.
2. Wluka AE, Davis SR, Bailey M, et al. - Users of oestrogen replacement therapy have more knee cartilage than non-users. Ann Rheum Dis, 2001. **60**(4): p. 332-6.
3. Torgerson DJ, Bell-Syer SE. - Hormone replacement therapy and prevention of nonvertebral fractures: a meta-analysis of randomized trials. JAMA, 2001. **285**(22): p. 2891-7.
4. Spector TD, Nandra D, Hart DJ, et al. - Is hormone replacement therapy protective for hand and knee osteoarthritis in women?: The Chingford Study. Ann Rheum Dis, 1997. **56**(7): p. 432-4.
5. Sandmark H, Hogstedt C, Lewold S, et al. - Osteoarthrosis of the knee in men and women in association with overweight, smoking, and hormone therapy. Ann Rheum Dis, 1999. **58**(3): p. 151-5.
6. Schmidt IU, Wakley GK, Turner RT. - Effects of estrogen and progesterone on tibia histomorphometry in growing rats. Calcif Tissue Int, 2000. **67**(1): p. 47-52.
7. Dietrich W, Haitel A, Holzer G, et al. - Estrogen receptor-beta is the

- 1  
2  
3  
4 predominant estrogen receptor subtype in normal human synovia. *J Soc*  
5  
6 *Gynecol Investig*, 2006. **13**(7): p. 512-7.  
7
- 8  
9 8. Sniekers YH, Weinans H, Bierma-Zeinstra SM, et al. - Animal models for  
10  
11 osteoarthritis: the effect of ovariectomy and estrogen treatment - a systematic  
12  
13 approach. *Osteoarthritis Cartilage*, 2008. **16**(5): p. 533-41.  
14
- 15  
16 9. Imada K, Matsui H, Tsuji H. Oophorectomy predisposes to degenerative  
17  
18 spondylolisthesis. *J Bone Joint Surg Br*, 1995. **77**(1): 126 – 130.  
19
- 20  
21 10. Marty-Poumarat C, Ostertag A, Baudoin C, et al. Does hormone replacement  
22  
23 therapy prevent lateral rotatory spondylolisthesis in postmenopausal women?  
24  
25 *Eur Spine J* 2012. **21**(6):1127-34.  
26
- 27  
28 11. Kellgren JH, Lawrence JS. - Radiological assessment of osteo-arthrosis. *Ann*  
29  
30 *Rheum Dis*, 1957. **16**(4): p. 494-502.  
31
- 32  
33 12. Felson DT, Zhang Y, Hannan MT, N, et al. - The incidence and natural history  
34  
35 of knee osteoarthritis in the elderly. *The Framingham Osteoarthritis Study*.  
36  
37 *Arthritis Rheum*, 1995. **38**(10): p. 1500-5.  
38
- 39  
40 13. Brouwer GM, van Tol AW, Bergink AP, et al. - Association between valgus and  
41  
42 varus alignment and the development and progression of radiographic  
43  
44 osteoarthritis of the knee. *Arthritis Rheum*, 2007. **56**(4): p. 1204-11.  
45
- 46  
47 14. Lawrence JS, Bremner JM, Bier F. - Osteo-arthrosis. Prevalence in the  
48  
49 population and relationship between symptoms and x-ray changes. *Ann*  
50  
51 *Rheum Dis*, 1966. **25**(1): p. 1-24.  
52
- 53  
54 15. Wilson MG, Michet CJ Jr, Ilstrup DM, et al. - Idiopathic symptomatic  
55  
56 osteoarthritis of the hip and knee: a population-based incidence study. *Mayo*  
57  
58 *Clin Proc*, 1990. **65**(9): p. 1214-21.  
59
- 60  
16. McAlindon TE, Snow S, Cooper C, Dieppe PA. - Radiographic patterns of

- 1  
2  
3  
4 osteoarthritis of the knee joint in the community: the importance of the  
5 patellofemoral joint. *Ann Rheum Dis*, 1992. **51**(7): p. 844-9.  
6  
7  
8  
9 17. Anderson GL, Limacher M, Assaf AR, et al. - Effects of conjugated equine  
10 estrogen in postmenopausal women with hysterectomy: the Women's Health  
11 Initiative randomized controlled trial. *JAMA*, 2004. **291**(14): p. 1701-12.  
12  
13 18. Ham KD, Loeser RF, Lindgren BR, et al. - Effects of long-term estrogen  
14 replacement therapy on osteoarthritis severity in cynomolgus monkeys.  
15 *Arthritis Rheum*, 2002. **46**(7): p. 1956-64.  
16  
17 19. Yang JH, Kim JH, Lim DS, et al. - Effect of combined sex hormone  
18 replacement on bone/cartilage turnover in a murine model of osteoarthritis.  
19 *Clin Orthop Surg*, 2012. **4**(3): p. 234-41.  
20  
21 20. Calvo E, Castañeda S, Largo R, et al. - Osteoporosis increases the severity of  
22 cartilage damage in an experimental model of osteoarthritis in rabbits.  
23 *Osteoarthritis Cartilage*, 2007. **15**(1): p. 69-77.  
24  
25 21. Arts J, Kuiper GG, Janssen JM, et al. - Differential expression of estrogen  
26 receptors alpha and beta mRNA during differentiation of human osteoblast  
27 SV-HFO cells. *Endocrinology*, 1997. **138**(11): p. 5067-70.  
28  
29 22. Høegh-Andersen P, Tankó LB, Andersen TL, et al. - Ovariectomized rats as a  
30 model of postmenopausal osteoarthritis: validation and application. *Arthritis*  
31 *Res Ther*, 2004. **6**(2): p. 19.  
32  
33 23. Räsänen T, Messner K. - Articular cartilage compressive stiffness following  
34 oophorectomy or treatment with 17beta-estradiol in young postpubertal  
35 rabbits. *Acta Obstet Gynecol Scand*, 1999. **78**(5): p. 357-62.  
36  
37 24. Gruber HE, Yamaguchi D, Ingram J, et al. Expression and localization of  
38 estrogen receptor-beta in annulus cells of the human intervertebral disc and  
39  
40  
41  
42  
43  
44  
45  
46  
47  
48  
49  
50  
51  
52  
53  
54  
55  
56  
57  
58  
59  
60

- 1  
2  
3  
4 the mitogenic effect of 17-beta-estradiol in vitro. BMC Musculoskelet Disord  
5  
6 2002. 3:4.  
7
- 8  
9 25. Baron YM, Brincat MP, Galea R, et al. Intervertebral disc height in treated  
10  
11 and untreated overweight post-menopausal women. Hum Reprod 2005.  
12  
13 20:3566e70.  
14
- 15 26. Wáng YX, Wáng JQ, Káplár Z. Increased low back pain prevalence in females  
16  
17 than in males after menopause age: evidences based on synthetic literature  
18  
19 review. Quant Imaging Med Surg. 2016. **6**(2):199-206.  
20
- 21 27. Yoshioka T, Sato B, Matsumoto K, et al. - Steroid receptors in osteoblasts.  
22  
23 Clin Orthop Relat Res, 1980. **148**: p. 297-303.  
24
- 25 28. Hart DJ, Spector TD. - Cigarette smoking and risk of osteoarthritis in women  
26  
27 in the general population: the Chingford study. Ann Rheum Dis, 1993. **52**(2): p.  
28  
29 93-6.  
30
- 31 29. Pearce F, Hui M, Ding C, et al. - Does smoking reduce the progression of  
32  
33 osteoarthritis? Meta-analysis of observational studies. Arthritis Care Res,  
34  
35 2013. **65**(7): p. 1026-33.  
36  
37
- 38 30. Mnatzaganian G, Ryan P, Reid CM, et al. - Smoking and primary total hip or  
39  
40 knee replacement due to osteoarthritis in 54,288 elderly men and women.  
41  
42 BMC Musculoskelet Disord, 2013. **14**(262): p. 1471-2474.  
43  
44
- 45 31. Schouten JS, van den Ouweland FA, Valkenburg HA. - A 12 year follow up  
46  
47 study in the general population on prognostic factors of cartilage loss in  
48  
49 osteoarthritis of the knee. Ann Rheum Dis, 1992. **51**(8): p. 932-7.  
50
- 51 32. Gullahorn L, Lippiello L, Karpman R. - Smoking and osteoarthritis: differential  
52  
53 effect of nicotine on human chondrocyte glycosaminoglycan and collagen  
54  
55 synthesis. Osteoarthritis Cartilage, 2005. **13**(10): p. 942-3.  
56  
57  
58  
59  
60



33. Davies-Tuck ML, Wluka AE, Forbes A, et al. - Smoking is associated with increased cartilage loss and persistence of bone marrow lesions over 2 years in community-based individuals. *Rheumatology*, 2009. **48**(10): p. 1227-31.

**Table 1.** Parameter comparison between spinal OA patients and the control group.

|                         | No Osteoarthritis | Osteoarthritis | P-value           |
|-------------------------|-------------------|----------------|-------------------|
|                         | N = 3361          | N = 904        |                   |
| <b>Smoking</b>          | 6.1% (0.6)        | 4.5% (0.9)     | 0.1340            |
| <b>Drinking (heavy)</b> | 0.5% (0.2)        | 0.3% (0.2)     | 0.4693            |
| <b>High activity</b>    | 15.1% (0.8)       | 12.1% (1.3)    | 0.0608            |
| <b>Urban residence</b>  | 71.0% (2.4)       | 69.6% (3.0)    | 0.5131            |
| <b>With spouse</b>      | 67.7% (1.1)       | 58.3% (2.1)    | <b>&lt;0.0001</b> |
| <b>High education</b>   | 22.0% (1.0)       | 14.7% (1.5)    | <b>&lt;0.0001</b> |
| <b>Low income</b>       | 33.9% (1.1)       | 42.8% (2.0)    | <b>&lt;0.0001</b> |
| <b>Contraception</b>    | 21.2% (0.9)       | 21.6% (1.6)    | 0.8115            |
| <b>HRT</b>              | 13.5% (0.7)       | 8.2% (1.1)     | <b>0.0002</b>     |
| <b>BMI ≥25</b>          | 24.2% (0.1)       | 24.4% (0.1)    | 0.0593            |
| <b>WC ≥85</b>           | 82.3% (0.2)       | 83.0% (0.3)    | 0.0673            |

An age-adjusted logistic regression model was used.

(P<0.05 indicates statistical significance; ()): standard error

N: Number in a group

BMI: Body mass index (kg/m<sup>2</sup>)

WC: Waist circumference (cm)

**Table 2.** Risk analysis of spinal OA with other related factors.

|                         | OR       | 95% CI      | P-value       |
|-------------------------|----------|-------------|---------------|
| <b>Age</b>              | <b>1</b> |             |               |
| <b>Smoking</b>          | 0.711    | 0.454–1.114 | 0.1367        |
| <b>Drinking (heavy)</b> | 0.853    | 0.220–3.308 | 0.8182        |
| <b>High activity</b>    | 0.892    | 0.676–1.178 | 0.4197        |
| <b>Urban residence</b>  | 1.077    | 0.870–1.332 | 0.4960        |
| <b>With spouse</b>      | 1.031    | 0.837–1.269 | 0.7746        |
| <b>High education</b>   | 0.912    | 0.693–1.201 | 0.5127        |
| <b>Low income</b>       | 0.999    | 0.816–1.222 | 0.9889        |
| <b>Contraception</b>    | 1.037    | 0.838–1.283 | 0.7359        |
| <b>HRT</b>              | 0.717    | 0.527–0.976 | <b>0.0344</b> |
| <b>BMI ≥25</b>          | 1.094    | 0.926–1.291 | 0.2920        |
| <b>WC ≥85</b>           | 0.975    | 0.811–1.172 | 0.7884        |

An age-adjusted logistic regression model was used.

(P<0.05 indicates statistical significance; ()): standard error)

**Table 3.** Prevalence and risk analysis for spinal OA with smoking in the HRT group.

|                 | <b>Nonsmokers</b> | <b>Smokers</b>     | <b>P-value</b> |
|-----------------|-------------------|--------------------|----------------|
| <b>Spine OA</b> | 83.5% (1.8)       | 98.4% (1.7)        | <b>0.025</b>   |
| <b>Odds</b>     | <b>1</b>          | 11.32 (1.31–17.90) | <b>0.027</b>   |

Age, BMI, WC, drinking, and exercise were adjusted.

(P<0.05 indicates statistical significance; ()): standard error, 95% CI)

**Table 4.** The prevalence of hormone therapy according to spinal pain and radiographic OA.

| OA             | No HRT |             | HRT |             | P-value           |
|----------------|--------|-------------|-----|-------------|-------------------|
|                | N      | %           | N   | %           |                   |
| <b>Grade 0</b> | 696    | 19.8% (1.0) | 184 | 30.2% (2.4) | <b>&lt;0.0001</b> |
| <b>Grade 1</b> | 1454   | 40.8% (1.0) | 253 | 46.5% (2.5) |                   |
| <b>Grade 2</b> | 1527   | 39.4% (1.1) | 151 | 23.3% (2.1) |                   |
| <b>Sx</b>      | 1302   | 34.7% (1.1) | 162 | 26.0% (2.2) | <b>0.0005</b>     |
| <b>OA + Sx</b> | 819    | 21.0% (1.1) | 85  | 13.1% (2.1) | <b>&lt;0.0001</b> |

An age-adjusted logistic regression model was used.

(P<0.05 indicates statistical significance; ()): standard error)

OA: Participants with only radiological findings;

Sx: Participants with only symptoms;

OA+Sx: Participants with both symptoms and radiological findings.

**Table 5.** Risk analysis of spinal OA with hormone therapy.

| HRT            | OR           | 95% CI             | P-value      |
|----------------|--------------|--------------------|--------------|
| OA             | 0.723        | 0.563–0.929        | <b>0.011</b> |
| Sx             | 0.916        | 0.723–1.159        | 0.464        |
| <b>OA + Sx</b> | <b>0.717</b> | <b>0.527–0.976</b> | <b>0.034</b> |

An age-adjusted logistic regression model was used.

(P<0.05 indicates statistical significance; ()): standard error)

OA: Participants with only radiological findings;

Sx: Participants with only symptoms;

OA+Sx: Participants with both symptoms and radiological findings.

1  
2  
3  
4  
5  
6  
7  
8  
9  
10  
11  
12  
13  
14  
15  
16  
17  
18  
19  
20  
21  
22  
23  
24  
25  
26  
27  
28  
29  
30  
31  
32  
33  
34  
35  
36  
37  
38  
39  
40  
41  
42  
43  
44  
45  
46  
47  
48  
49  
50  
51  
52  
53  
54  
55  
56  
57  
58  
59  
60

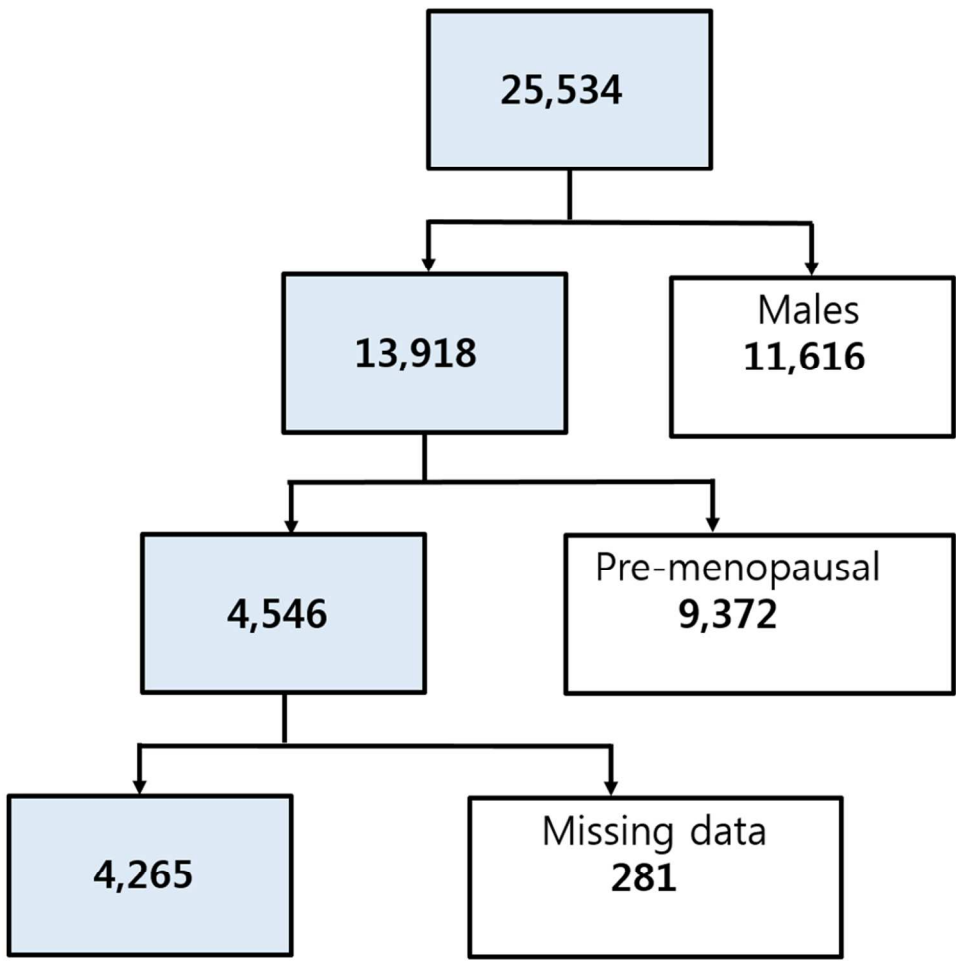

184x185mm (150 x 150 DPI)

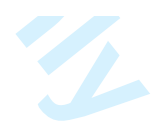

## STROBE Statement

Checklist of items that should be included in reports of observational studies

| Section/Topic            | Item No | Recommendation                                                                                                                                                                             | Reported on Page No |
|--------------------------|---------|--------------------------------------------------------------------------------------------------------------------------------------------------------------------------------------------|---------------------|
| Title and abstract       | 1       | (a) Indicate the study's design with a commonly used term in the title or the abstract                                                                                                     | 2                   |
|                          |         | (b) Provide in the abstract an informative and balanced summary of what was done and what was found                                                                                        | 2                   |
| <b>Introduction</b>      |         |                                                                                                                                                                                            |                     |
| Background/rationale     | 2       | Explain the scientific background and rationale for the investigation being reported                                                                                                       | 3                   |
| Objectives               | 3       | State specific objectives, including any prespecified hypotheses                                                                                                                           | 3                   |
| <b>Methods</b>           |         |                                                                                                                                                                                            |                     |
| Study design             | 4       | Present key elements of study design early in the paper                                                                                                                                    | 4                   |
| Setting                  | 5       | Describe the setting, locations, and relevant dates, including periods of recruitment, exposure, follow-up, and data collection                                                            | 4                   |
|                          |         | (a) <i>Cohort study</i> —Give the eligibility criteria, and the sources and methods of selection of participants. Describe methods of follow-up                                            |                     |
| Participants             | 6       | <i>Case-control study</i> —Give the eligibility criteria, and the sources and methods of case ascertainment and control selection. Give the rationale for the choice of cases and controls | 4-6                 |
|                          |         | <i>Cross-sectional study</i> —Give the eligibility criteria, and the sources and methods of selection of participants                                                                      |                     |
| Variables                | 7       | (b) <i>Cohort study</i> —For matched studies, give matching criteria and number of exposed and unexposed                                                                                   | 4-6                 |
|                          |         | <i>Case-control study</i> —For matched studies, give matching criteria and the number of controls per case                                                                                 |                     |
| Data sources/measurement | 8*      | Clearly define all outcomes, exposures, predictors, potential confounders, and effect modifiers. Give diagnostic criteria, if applicable                                                   | 4-6                 |
| Bias                     | 9       | For each variable of interest, give sources of data and details of methods of assessment (measurement). Describe comparability of assessment methods if there is more than one group       | 4                   |
| Study size               | 10      | Describe any efforts to address potential sources of bias                                                                                                                                  | 4-6                 |
| Quantitative variables   | 11      | Explain how the study size was arrived at                                                                                                                                                  | 4                   |
|                          |         | Explain how quantitative variables were handled in the analyses. If applicable, describe which groupings were chosen and why                                                               | 5-6                 |
| Statistical methods      | 12      | (a) Describe all statistical methods, including those used to control for confounding                                                                                                      | 4-6                 |
|                          |         | (b) Describe any methods used to examine subgroups and interactions                                                                                                                        | 4-6                 |
|                          |         | (c) Explain how missing data were addressed                                                                                                                                                | 4-6                 |
|                          |         | (d) <i>Cohort study</i> —If applicable, explain how loss to follow-up was addressed                                                                                                        |                     |
|                          |         | <i>Case-control study</i> —If applicable, explain how matching of cases and controls was addressed                                                                                         | 4-6                 |
|                          |         | <i>Cross-sectional study</i> —If applicable, describe analytical methods taking account of sampling strategy                                                                               |                     |
|                          |         | (e) Describe any sensitivity analyses                                                                                                                                                      | 4-6                 |

| Section/Topic            | Item No | Recommendation                                                                                                                                                                                               | Reported on Page No |
|--------------------------|---------|--------------------------------------------------------------------------------------------------------------------------------------------------------------------------------------------------------------|---------------------|
| <b>Results</b>           |         |                                                                                                                                                                                                              |                     |
| Participants             | 13*     | (a) Report numbers of individuals at each stage of study—eg numbers potentially eligible, examined for eligibility, confirmed eligible, included in the study, completing follow-up, and analysed            | 7                   |
|                          |         | (b) Give reasons for non-participation at each stage                                                                                                                                                         | 7                   |
|                          |         | (c) Consider use of a flow diagram                                                                                                                                                                           | 7                   |
| Descriptive data         | 14*     | (a) Give characteristics of study participants (eg demographic, clinical, social) and information on exposures and potential confounders                                                                     | 7                   |
|                          |         | (b) Indicate number of participants with missing data for each variable of interest                                                                                                                          | 7                   |
|                          |         | (c) <i>Cohort study</i> —Summarise follow-up time (eg, average and total amount)                                                                                                                             | 7                   |
| Outcome data             | 15*     | <i>Cohort study</i> —Report numbers of outcome events or summary measures over time                                                                                                                          | 7                   |
|                          |         | <i>Case-control study</i> —Report numbers in each exposure category, or summary measures of exposure                                                                                                         | 7                   |
|                          |         | <i>Cross-sectional study</i> —Report numbers of outcome events or summary measures                                                                                                                           | 7                   |
| Main results             | 16      | (a) Give unadjusted estimates and, if applicable, confounder-adjusted estimates and their precision (eg, 95% confidence interval). Make clear which confounders were adjusted for and why they were included | 7                   |
|                          |         | (b) Report category boundaries when continuous variables were categorized                                                                                                                                    | 7                   |
|                          |         | (c) If relevant, consider translating estimates of relative risk into absolute risk for a meaningful time period                                                                                             | 7                   |
| Other analyses           | 17      | Report other analyses done—eg analyses of subgroups and interactions, and sensitivity analyses                                                                                                               | 7                   |
| <b>Discussion</b>        |         |                                                                                                                                                                                                              |                     |
| Key results              | 18      | Summarise key results with reference to study objectives                                                                                                                                                     | 8                   |
| Limitations              | 19      | Discuss limitations of the study, taking into account sources of potential bias or imprecision. Discuss both direction and magnitude of any potential bias                                                   | 10                  |
| Interpretation           | 20      | Give a cautious overall interpretation of results considering objectives, limitations, multiplicity of analyses, results from similar studies, and other relevant evidence                                   | 9                   |
| Generalisability         | 21      | Discuss the generalisability (external validity) of the study results                                                                                                                                        | 8-11                |
| <b>Other Information</b> |         |                                                                                                                                                                                                              |                     |
| Funding                  | 22      | Give the source of funding and the role of the funders for the present study and, if applicable, for the original study on which the present article is based                                                | 12                  |

\*Give information separately for cases and controls in case-control studies and, if applicable, for exposed and unexposed groups in cohort and cross-sectional studies.

**Note:** An Explanation and Elaboration article discusses each checklist item and gives methodological background and published examples of transparent reporting. The STROBE checklist is best used in conjunction with this article (freely available on the Web sites of PLoS Medicine at <http://www.plosmedicine.org/>, Annals of Internal Medicine at <http://www.annals.org/>, and Epidemiology at <http://www.epidem.com/>). Information on the STROBE Initiative is available at [www.strobe-statement.org](http://www.strobe-statement.org).



# BMJ Open

**The relationship between hormone replacement therapy  
and spinal osteoarthritis  
: A nationwide health survey analysis of the elderly Korean  
population**

|                                    |                                                                                                                                                                                                                                                                                                              |
|------------------------------------|--------------------------------------------------------------------------------------------------------------------------------------------------------------------------------------------------------------------------------------------------------------------------------------------------------------|
| Journal:                           | <i>BMJ Open</i>                                                                                                                                                                                                                                                                                              |
| Manuscript ID                      | bmjopen-2017-018063.R2                                                                                                                                                                                                                                                                                       |
| Article Type:                      | Research                                                                                                                                                                                                                                                                                                     |
| Date Submitted by the Author:      | 12-Oct-2017                                                                                                                                                                                                                                                                                                  |
| Complete List of Authors:          | Park, Jung-Ho; Department of Orthopedics<br>Hong, Jae-Young; Department of Orthopedics<br>Han, Kyungdo; College of Medicine, Catholic University<br>Han, Seung-Woo; Department of Orthopedics<br>Chun, Eun Mi; Ewha Woman's University Mokdong Hospital, Division of<br>Pulmonary and Critical Care Medicine |
| <b>Primary Subject<br>Heading</b>: | Rheumatology                                                                                                                                                                                                                                                                                                 |
| Secondary Subject Heading:         | Epidemiology, Public health                                                                                                                                                                                                                                                                                  |
| Keywords:                          | osteoarthritis, Spine < ORTHOPAEDIC & TRAUMA SURGERY, hormone<br>replacement therapy                                                                                                                                                                                                                         |
|                                    |                                                                                                                                                                                                                                                                                                              |

SCHOLARONE™  
Manuscripts

**Title:**

**The relationship between hormone replacement therapy and spinal osteoarthritis: A nationwide health survey analysis of the elderly Korean population**

**Authors:**

**Jung-Ho Park,<sup>1</sup> MD, PhD; Jae-Young Hong,<sup>1</sup> MD, PhD; Kyungdo Han,<sup>2</sup> PhD; Seung-Woo Han,<sup>1</sup> MD; Eun Mi Chun,<sup>3</sup> MD, PhD.**

**From**

<sup>1</sup> Department of Orthopedics, Korea University Ansan Hospital, Ansan, South Korea

<sup>2</sup> Department of Biostatistics, College of Medicine, Catholic University, Seoul, South Korea

<sup>3</sup> Division of Pulmonary and Critical Care Medicine, Department of Internal Medicine, Ewha Woman's University Mokdong Hospital, Seoul South Korea

**Corresponding Author:**

**Jae-Young Hong;** Department of Orthopedics, Korea University Ansan Hospital, Gojan Dong, Danwon Gu, Ansan 425-707, South Korea

Ph: +82-31-412-6577 Fax: +82-31-487-9502

Email: osspine@korea.ac.kr

## Abstract

### Objectives

To identify the effects of hormone replacement therapy (HRT) on spinal osteoarthritis (OA).

### Methods and design

A cross-sectional study of a nationwide survey was performed.

### Setting

This study collected data from the fifth Korean National Health and Nutrition Examination Survey (KNHANES V-5; 2010–2012).

### Participants

After excluding ineligible respondents, the total number of participants in this study was 4,265 females. Participants were asked to report symptoms and disabilities related to spinal OA. In addition, plain radiographs of the spine were taken of all patients.

### Primary and secondary outcome measures

Demographic and lifestyle variables were compared between the HRT and non-HRT groups. In addition, radiographic examination and symptom assessment were performed to determine the existence of spinal OA.

### Results

Marital status, education, income, and HRT were correlated with spinal OA. A risk analysis of related factors showed that HRT and age had effects on spinal OA (odds ratios: 0.717 and 1.257). Nevertheless, in the HRT group, smokers had a increased risk of spinal OA. In addition, the HRT group demonstrated a lower prevalence of spinal OA. The calculated risk for compromised morbidity with HRT compared to the

1  
2  
3  
4 prevalence of spinal OA was 0.717 (odds ratio). The duration of HRT was also  
5  
6 related to the risk for spinal OA. The group that had been taking HRT for more than  
7  
8 one year showed decreased risk (odds ratio: 0.686) compared to patients with less  
9  
10 than one year of HRT (odds ratio: 0.744; P<0.05).  
11

### 12 13 **Conclusion**

14  
15 Women receiving HRT showed a lower prevalence of spinal OA. HRT also correlated  
16  
17 with a decrease in spinal OA morbidity.  
18  
19

20  
21 **Key words:** Osteoarthritis, Spine, Hormone replacement therapy  
22  
23  
24  
25  
26  
27  
28  
29  
30  
31  
32  
33  
34  
35  
36  
37  
38  
39  
40  
41  
42  
43  
44  
45  
46  
47  
48  
49  
50  
51  
52  
53  
54  
55  
56  
57  
58  
59  
60

## Strength and limitations of this study

-This study analyzed a large cross-sectional population and used sophisticated statistical methods, which could enhance the significance of the results.

-The study included analysis of demographic and lifestyle variables as well as radiographic examinations and symptom assessment, which could enhance the significance of the results.

-The cross-sectional study design precluded establishment of a causal relationship between HRT and OA.

-More sophisticated diagnostic tools, such as magnetic resonance imaging or computed tomography, might be needed to evaluate the precise status of patient joints.

-The prevalence or etiology of OA could also be influenced by ethnic or environmental factors, which could decrease the generalizability of our results.

## Introduction

Menopause is a particularly influential period during which women adapt to a new biological state. Women in the postmenopausal period tend to have low estradiol and serotonin concentrations and a high level of follicle stimulating hormone.[1-4] Hormone replacement therapy (HRT) has shown several benefits for elderly females because it minimizes symptoms related to estrogen deficiency.[1,3-8] However, few studies have investigated the effects of hormone therapy on the musculoskeletal system. Imada et al. performed a case-control study of the influence of oophorectomy on the development of degenerative spondylolisthesis. They reported that the abrupt decrease in estradiol level caused by oophorectomy could be a predisposing factor in degenerative spondylolisthesis at L4/5.[9] Recently, more people have begun experiencing degenerative osteoarthritis (OA), which can occur in several mobile joints of the body, including the spine. We hypothesized that HRT might prevent the onset of degenerative spinal disease and therefore might contribute to the prevention of low back pain.[10,11] The objective of this study was to estimate the associations between hormonal factors and spinal OA in a Korean population. We analyzed a large cross-sectional population using data from the Korea National Health and Nutrition Examination Survey (KNHANES) to determine the relationship between HRT and spinal OA.

## Methods

### Study population

The study design was cross-sectional, using three years of data from KNHANES-V (2010–2012), a nationwide health and nutrition survey that is conducted regularly. The KNHANES is conducted annually by the Korean Centers for Disease Control for civilians, and a survey of spine osteoarthritis was included. The KNHANES is a nationally representative database on health and nutrition, and the subjects were selected from stratified, multistage probability samples of Korean households based on gender, age, and geographical area. The number of participants who completed both the health interview and health examination surveys was 25,534 (Figure 1). We excluded men (n=11,616), pre-menopausal women (n=9,372) and those with missing data for variables included in the analysis (n=281). The remaining 4,265 participants underwent physical and laboratory examinations, including a radiographic examination of the spine. In addition, health interview data were retrieved, including demographic and lifestyle variables. All participants provided informed consent, and the Korea Centers for Disease Control and Prevention Institutional Review Board approved this study (2010-02CON-21-C, 2011-02CON-06-C, 2012-01EXP-01-2C).

### Radiographic examination and symptom assessment

Anteroposterior and lateral plain radiographic examinations of the lumbar spine were taken using a SD3000 Synchro Stand (Accele Ray, Switzerland). Radiographic changes in each joint were independently assessed by two radiologists using the Kellgren/Lawrence (KL) grading system as follows: Grade 0, no visible features of OA, doubtful/questionable osteophytes; Grade 1, minimal, definitive small

1  
2  
3  
4 osteophytes; and Grade 2, definitive moderate osteophytes or subchondral bone  
5  
6 cysts and sclerosis with or without foraminal stenosis.[12] The presence of  
7  
8 radiographic OA was defined as a KL grade of 2 or more. If the grades given by the  
9  
10 two radiologists differed, the higher grade was accepted. The concordance rate for  
11  
12 KL grades within one grade for the same case was 94.76%. In addition, all patients  
13  
14 described their joint-related symptoms (e.g., spine), and those symptoms were  
15  
16 scored. Participants who reported experiencing arthritic pain for more than one of the  
17  
18 past three months were asked to report the pain intensity using a numeric rating  
19  
20 scale (NRS) ranging from 0–10, regardless of whether they used medication.  
21  
22  
23  
24  
25

### 26 **Demographic and lifestyle variables**

27  
28 HRT was defined as use of more than one year of regular hormone medication.  
29  
30 Exogenous hormone-related factors included oral contraceptive (OC) use duration  
31  
32 and HRT starting age and duration. Demographic variables were age, gender,  
33  
34 monthly household income, marital status, current residence, education level,  
35  
36 smoking status (never smoker, past smoker, or current smoker), alcohol  
37  
38 consumption (g/d), and physical activity (low, moderate, or high). Household income  
39  
40 was calculated as the monthly household income divided by the square root of the  
41  
42 number of members. Education was classified by years of schooling (<6 years, 7–9  
43  
44 years, 10–12 years, and >12 years). Marital status was stratified into three groups:  
45  
46 never married, married and living with spouse, and divorced/widowed. Respondents  
47  
48 who had smoked more than 100 cigarettes in their lifetime were classified as  
49  
50 smokers and placed into the smoker group. Physical activity was quantified  
51  
52 according to the Korean version of the International Physical Activity Questionnaire.  
53  
54  
55 Body weight and height were obtained, and the body mass index was calculated by  
56  
57  
58  
59  
60



1  
2  
3  
4 dividing the body weight in kg by the height<sup>2</sup> in m<sup>2</sup>. Waist circumference was  
5  
6 measured between the lower costal margin and the iliac crest. We defined obesity as  
7  
8 a body mass index  $\geq 25$ .  
9

### 10 11 12 **Statistical analyses**

13  
14  
15 Statistical analyses were conducted using SAS survey procedures (version 9.3; SAS  
16  
17 Institute, Cary, NC, US) in a manner that reflected the sampling weights and  
18  
19 provided nationally representative estimates. The characteristics of patients with  
20  
21 spinal OA were compared with those of participants without spinal OA using two  
22  
23 independent sample *t*-tests, a one-way analysis of variance for continuous variables,  
24  
25 and Chi-square tests for categorical variables. Multivariate logistic regression  
26  
27 analyses were conducted to investigate the relationships between parameters.  
28  
29  
30  
31  
32  
33  
34  
35  
36  
37  
38  
39  
40  
41  
42  
43  
44  
45  
46  
47  
48  
49  
50  
51  
52  
53  
54  
55  
56  
57  
58  
59  
60

## Results

### The relationships between demographic factors and spinal OA

We defined spinal OA as definite osteoarthritis on plain radiographs with related spinal pain. The mean age of the study population was  $64.3 \pm 0.2$  (50–94) years. The total numbers of participants with spinal OA and HRT were 904 and 588, respectively, out of 4,265 total participants. We found no spinal OA in 3,361 participants, regardless of HRT status. In terms of demographic factors, marital status, education, income, and HRT correlated with a decrease in spinal OA morbidity (Table 1). A risk analysis of related factors showed that HRT had significant effects on spinal OA (odds ratio (OR): 0.717, Table 2). However, in the HRT group, smokers showed a significantly increased risk of spinal OA (OR: 11.3) compared to nonsmokers (Table 3).

### Relationship between HRT and spinal OA

The HRT group had a lower prevalence of spinal OA. In addition, the spinal OA group showed a significantly lower rate of HRT (Table 4). Calculated risks for compromised morbidity were 0.717 (OR) compared to the control group (Table 5). The solitary radiographic spinal OA and solitary symptom groups also showed a lower percentage of HRT than controls (OR: 0.723 and 0.916, respectively); however, the radiographic OA plus symptom group had the lowest percentage of HRT and significantly higher morbidity (OR: 0.717). The duration of HRT was also related to the risk of spinal OA: the >1 year of medication group had a significantly decreased

1  
2  
3  
4 risk (OR: 0.686) compared to the <1 year of medication group (OR: 0.840).  
5  
6  
7  
8  
9

## 10 11 **Discussion** 12

13  
14 Osteoarthritis involves degenerative changes in soft tissue, subchondral bone, and  
15 hyaline cartilage that lead to serious joint disability.[5,13-17] Estrogen deficiency is  
16 related to the occurrence and progression of OA. Beginning in early menopause, the  
17 number of women who suffer from OA increases dramatically.[1-6,13,18,19] The  
18 association between estrogen and OA has been verified in a murine model, and  
19 research on both estrogen deficiency and complement in articular cartilage has been  
20 conducted in animal models.[20] In many experimental animal studies, ovariectomy  
21 was reported to induce OA, whereas estrogen complement delayed cartilage  
22 degeneration.[6,8,21-24] Estrogens act on estrogen receptors distributed throughout  
23 the articular cartilage, synovial membrane, and ligaments and are thought to be  
24 related to degenerative changes. In addition, Gruber et al. suggested the expression  
25 and localization of estrogen receptor-beta in the annulus cells of human  
26 intervertebral discs. They provided evidence of ER beta gene expression in human  
27 intervertebral disc cells in vivo and in vitro. Culturing annulus cells in the presence of  
28 17-beta-estradiol significantly increased cell proliferation.[25] Baron et al.  
29 investigated the effects of menopause and HRT on the intervertebral discs and  
30 reported that estrogen-replete women appear to maintain higher intervertebral discs  
31 than untreated post-menopausal women.[26] Moreover, patients receiving long-term  
32 HRT have a lower risk of knee and hip OA on plain radiographs than women who do  
33 not take HRT.[2,3,5,16,20]  
34  
35  
36  
37  
38  
39  
40  
41  
42  
43  
44  
45  
46  
47  
48  
49  
50  
51  
52  
53  
54  
55  
56  
57  
58  
59  
60

1  
2  
3  
4  
5  
6 In this study, age, marital status, education level, and income all significantly  
7 correlated with OA morbidity. However, BMI and body composition factors were not  
8 associated with spinal OA. Previous studies have reported that joint pain is  
9 associated with several socio-demographic factors, such as gender, advanced age,  
10 low education level, smoking, and occupation.[10,15] In particular, we found  
11 significant relationships between factors in the female group and higher prevalence  
12 of OA. It appears that the female population is more prone to OA, and this  
13 association could be related to hormonal influences, especially in an elderly  
14 population. Wang et al. reported increased low back pain prevalence in females than  
15 males, especially after menopause. They reported that higher low back pain  
16 prevalence in school age girls compared to school age boys is likely caused by  
17 psychological factors, female hormone fluctuation, and menstruation. Compared with  
18 young and middle-aged subjects, a further increase in low back pain prevalence in  
19 females compared with males was noted after menopause.[27] In our study, the HRT  
20 group showed a significantly lower prevalence of spinal OA. We therefore assume  
21 that HRT can influence the prevalence of spinal OA. We found a positive, long-term  
22 effect of HRT, suggesting that estrogen deficiency could be a cause of OA and  
23 highlighting the need for further studies on the effects of estrogen on cartilage and  
24 bone. Although we could not determine cause and effect relationships, HRT might  
25 prevent OA. We hypothesized that HRT has a protective effect on the development  
26 of spinal OA. In accordance with our hypothesis, both spinal pain and prevalence of  
27 radiographic spinal OA were lower in the HRT group. The duration of hormonal  
28 therapy also showed a significant relationship with prevalence of spinal OA, which  
29 suggests the importance of continuous HRT in elderly females.  
30  
31  
32  
33  
34  
35  
36  
37  
38  
39  
40  
41  
42  
43  
44  
45  
46  
47  
48  
49  
50  
51  
52  
53  
54  
55  
56  
57  
58  
59  
60

1  
2  
3  
4  
5  
6 In the present study, smoking was not significantly related to spinal OA morbidity, but  
7  
8 it was correlated with an increased prevalence of spinal OA, especially in the HRT  
9  
10 group. However, the association between the risk of OA and smoking is still unclear.  
11  
12 Some studies have reported that smoking is a protective factor against severe OA. In  
13  
14 contrast, observational studies have concluded that smoking has no protective effect  
15  
16 on the progression of OA.[7,26,28-34] In any case, smokers prescribed HRT showed  
17  
18 a significantly increased risk of OA compared to nonsmokers taking HRT, even  
19  
20 though the use of HRT had an overall protective effect against OA. These data show  
21  
22 that smoking could have a hazardous effect on joint cartilage that could eliminate the  
23  
24 protective effect of HRT for OA.  
25  
26  
27  
28  
29

30  
31 This study has several limitations. First, the cross-sectional study design prevented  
32  
33 us from establishing causal relationships between HRT and OA. In this study, we  
34  
35 could not match the OA site and spinal pain origin. We used a cross-sectional  
36  
37 nationwide health survey with a brief health interview regarding pain related to each  
38  
39 joint (e.g., hip, knee, and spine). Therefore, we could not clarify the relationship  
40  
41 between spinal OA and pain with a spinal origin. Future prospective studies will be  
42  
43 required to determine causal relationships. Second, the use of a single 11-point NRS  
44  
45 did not allow us to evaluate the exact intensity of the respondents' acute and chronic  
46  
47 pain, including functional impairment. In addition, more sophisticated diagnostic tools,  
48  
49 such as magnetic resonance imaging or computed tomography, might be needed to  
50  
51 evaluate the precise status of patient joints. Third, the prevalence and etiology of OA  
52  
53 might be influenced by ethnic or environmental factors, which could decrease the  
54  
55 generalizability of our study. In addition, the relatively small number of smokers in the  
56  
57  
58  
59  
60

1  
2  
3  
4 HRT group could dilute the significance of that result. Despite these limitations, our  
5  
6 study analyzed a large cross-sectional population and used sophisticated statistical  
7  
8 methods. We found a significantly lower prevalence of spinal OA in patients receiving  
9  
10 HRT. We believe that our results will be helpful to physicians treating OA  
11  
12

13  
14  
15 In conclusion, populations receiving HRT showed a significantly lower prevalence of  
16  
17 spinal OA, and the duration of HRT was significantly related to spinal OA prevalence.  
18  
19  
20  
21  
22  
23  
24  
25  
26  
27  
28  
29  
30  
31  
32  
33  
34  
35  
36  
37  
38  
39  
40  
41  
42  
43  
44  
45  
46  
47  
48  
49  
50  
51  
52  
53  
54  
55  
56  
57  
58  
59  
60

## Figure legends

### Figure 1

A flow chart showing the inclusion and exclusion of participants according to study criteria.

## Author contributions

All authors made substantial contributions to sections (1), (2), and (3) as described below:

- (1) Study conception and design, data acquisition, and data analysis and interpretation- **JHP, JYH**
- (2) Drafting of the manuscript or revising it critically for important intellectual content- **KDH, SWH**
- (3) Final approval of the version to be submitted- **EMC, JYH**

## Conflict of interest

There are no conflicts of interest to report.

## Funding

This study was not supported by any fund or grant.

## Data sharing statement

Fifth Korean National Health and Nutrition Examination Survey (KNHANES-V: 2010–2012) data are available to any researchers under approval of an IRB.



## References

1. Effects of hormone therapy on bone mineral density: results from the postmenopausal estrogen/progestin interventions (PEPI) trial. The Writing Group for the PEPI. JAMA, 1996. **276**(17): p. 1389-96.
2. Wluka AE, Davis SR, Bailey M, et al. - Users of oestrogen replacement therapy have more knee cartilage than non-users. Ann Rheum Dis, 2001. **60**(4): p. 332-6.
3. Torgerson DJ, Bell-Syer SE. - Hormone replacement therapy and prevention of nonvertebral fractures: a meta-analysis of randomized trials. JAMA, 2001. **285**(22): p. 2891-7.
4. Spector TD, Nandra D, Hart DJ, et al. - Is hormone replacement therapy protective for hand and knee osteoarthritis in women?: The Chingford Study. Ann Rheum Dis, 1997. **56**(7): p. 432-4.
5. Sandmark H, Hogstedt C, Lewold S, et al. - Osteoarthrosis of the knee in men and women in association with overweight, smoking, and hormone therapy. Ann Rheum Dis, 1999. **58**(3): p. 151-5.
6. Schmidt IU, Wakley GK, Turner RT. - Effects of estrogen and progesterone on tibia histomorphometry in growing rats. Calcif Tissue Int, 2000. **67**(1): p. 47-52.
7. Dietrich W, Haitel A, Holzer G, et al. - Estrogen receptor-beta is the

- 1  
2  
3  
4 predominant estrogen receptor subtype in normal human synovia. J Soc  
5 Gynecol Investig, 2006. **13**(7): p. 512-7.  
6  
7  
8  
9 8. Sniekers YH, Weinans H, Bierma-Zeinstra SM, et al. - Animal models for  
10 osteoarthritis: the effect of ovariectomy and estrogen treatment - a systematic  
11 approach. Osteoarthritis Cartilage, 2008. **16**(5): p. 533-41.  
12  
13  
14  
15 9. Imada K, Matsui H, Tsuji H. Oophorectomy predisposes to degenerative  
16 spondylolisthesis. J Bone Joint Surg Br, 1995. **77**(1): 126 – 130.  
17  
18  
19  
20 10. Marty-Poumarat C, Ostertag A, Baudoin C, et al. Does hormone replacement  
21 therapy prevent lateral rotatory spondylolisthesis in postmenopausal women?  
22 Eur Spine J 2012. **21**(6):1127-34.  
23  
24  
25  
26 11. Wang YX. - Menopause as a potential cause for higher prevalence of low back  
27 pain in women than in age-matched men. Journal of Orthopaedic Translation  
28 2017. **8**:1-4.  
29  
30  
31  
32  
33 12. Kellgren JH, Lawrence JS. - Radiological assessment of osteo-arthrosis. Ann  
34 Rheum Dis, 1957. **16**(4): p. 494-502.  
35  
36  
37  
38 13. Felson DT, Zhang Y, Hannan MT, N, et al. - The incidence and natural history  
39 of knee osteoarthritis in the elderly. The Framingham Osteoarthritis Study.  
40 Arthritis Rheum, 1995. **38**(10): p. 1500-5.  
41  
42  
43  
44 14. Brouwer GM, van Tol AW, Bergink AP, et al. - Association between valgus and  
45 varus alignment and the development and progression of radiographic  
46 osteoarthritis of the knee. Arthritis Rheum, 2007. **56**(4): p. 1204-11.  
47  
48  
49  
50 15. Lawrence JS, Bremner JM, Bier F. - Osteo-arthrosis. Prevalence in the  
51 population and relationship between symptoms and x-ray changes. Ann  
52 Rheum Dis, 1966. **25**(1): p. 1-24.  
53  
54  
55  
56  
57 16. Wilson MG, Michet CJ Jr, Ilstrup DM, et al. - Idiopathic symptomatic  
58  
59  
60

- 1  
2  
3  
4 osteoarthritis of the hip and knee: a population-based incidence study. Mayo  
5 Clin Proc, 1990. **65**(9): p. 1214-21.  
6  
7  
8  
9 17. McAlindon TE, Snow S, Cooper C, Dieppe PA. - Radiographic patterns of  
10 osteoarthritis of the knee joint in the community: the importance of the  
11 patellofemoral joint. Ann Rheum Dis, 1992. **51**(7): p. 844-9.  
12  
13 18. Anderson GL, Limacher M, Assaf AR, et al. - Effects of conjugated equine  
14 estrogen in postmenopausal women with hysterectomy: the Women's Health  
15 Initiative randomized controlled trial. JAMA, 2004. **291**(14): p. 1701-12.  
16  
17 19. Ham KD, Loeser RF, Lindgren BR, et al. - Effects of long-term estrogen  
18 replacement therapy on osteoarthritis severity in cynomolgus monkeys.  
19 Arthritis Rheum, 2002. **46**(7): p. 1956-64.  
20  
21 20. Yang JH, Kim JH, Lim DS, et al. - Effect of combined sex hormone  
22 replacement on bone/cartilage turnover in a murine model of osteoarthritis.  
23 Clin Orthop Surg, 2012. **4**(3): p. 234-41.  
24  
25 21. Calvo E, Castañeda S, Largo R, et al. - Osteoporosis increases the severity of  
26 cartilage damage in an experimental model of osteoarthritis in rabbits.  
27 Osteoarthritis Cartilage, 2007. **15**(1): p. 69-77.  
28  
29 22. Arts J, Kuiper GG, Janssen JM, et al. - Differential expression of estrogen  
30 receptors alpha and beta mRNA during differentiation of human osteoblast  
31 SV-HFO cells. Endocrinology, 1997. **138**(11): p. 5067-70.  
32  
33 23. Høegh-Andersen P, Tankó LB, Andersen TL, et al. - Ovariectomized rats as a  
34 model of postmenopausal osteoarthritis: validation and application. Arthritis  
35 Res Ther, 2004. **6**(2): p. 19.  
36  
37 24. Räsänen T, Messner K. - Articular cartilage compressive stiffness following  
38 oophorectomy or treatment with 17beta-estradiol in young postpubertal  
39  
40  
41  
42  
43  
44  
45  
46  
47  
48  
49  
50  
51  
52  
53  
54  
55  
56  
57  
58  
59  
60

- 1  
2  
3  
4 rabbits. *Acta Obstet Gynecol Scand*, 1999. **78**(5): p. 357-62.
- 5  
6 25. Gruber HE, Yamaguchi D, Ingram J, et al. Expression and localization of  
7 estrogen receptor-beta in annulus cells of the human intervertebral disc and  
8 the mitogenic effect of 17-beta-estradiol in vitro. *BMC Musculoskelet Disord*  
9 2002. 3:4.
- 10  
11 26. Baron YM, Brincat MP, Galea R, et al. Intervertebral disc height in treated  
12 and untreated overweight post-menopausal women. *Hum Reprod* 2005.  
13 20:3566e70.
- 14  
15 27. Wáng YX, Wáng JQ, Káplár Z. Increased low back pain prevalence in females  
16 than in males after menopause age: evidences based on synthetic literature  
17 review. *Quant Imaging Med Surg*. 2016. **6**(2):199-206.
- 18  
19 28. Yoshioka T, Sato B, Matsumoto K, et al. - Steroid receptors in osteoblasts.  
20 *Clin Orthop Relat Res*, 1980. **148**: p. 297-303.
- 21  
22 29. Hart DJ, Spector TD. - Cigarette smoking and risk of osteoarthritis in women  
23 in the general population: the Chingford study. *Ann Rheum Dis*, 1993. **52**(2): p.  
24 93-6.
- 25  
26 30. Pearce F, Hui M, Ding C, et al. - Does smoking reduce the progression of  
27 osteoarthritis? Meta-analysis of observational studies. *Arthritis Care Res*,  
28 2013. **65**(7): p. 1026-33.
- 29  
30 31. Mnatzaganian G, Ryan P, Reid CM, et al. - Smoking and primary total hip or  
31 knee replacement due to osteoarthritis in 54,288 elderly men and women.  
32 *BMC Musculoskelet Disord*, 2013. **14**(262): p. 1471-2474.
- 33  
34 32. Schouten JS, van den Ouweland FA, Valkenburg HA. - A 12 year follow up  
35 study in the general population on prognostic factors of cartilage loss in  
36 osteoarthritis of the knee. *Ann Rheum Dis*, 1992. **51**(8): p. 932-7.
- 37  
38  
39  
40  
41  
42  
43  
44  
45  
46  
47  
48  
49  
50  
51  
52  
53  
54  
55  
56  
57  
58  
59  
60

- 1  
2  
3  
4 33. Gullahorn L, Lippiello L, Karpman R. - Smoking and osteoarthritis: differential  
5 effect of nicotine on human chondrocyte glycosaminoglycan and collagen  
6 synthesis. *Osteoarthritis Cartilage*, 2005. **13**(10): p. 942-3.  
7  
8  
9  
10  
11 34. Davies-Tuck ML, Wluka AE, Forbes A, et al. - Smoking is associated with  
12 increased cartilage loss and persistence of bone marrow lesions over 2 years  
13 in community-based individuals. *Rheumatology*, 2009. **48**(10): p. 1227-31.  
14  
15  
16  
17

18 **Table 1.** Parameter comparison between spinal OA patients and the control group.  
19

|                         | No<br>Osteoarthritis | Osteoarthritis | P-value       |
|-------------------------|----------------------|----------------|---------------|
|                         | N = 3361             | N = 904        |               |
| <b>Smoking</b>          | 6.1% (0.6)           | 4.5% (0.9)     | 0.1340        |
| <b>Drinking (heavy)</b> | 0.5% (0.2)           | 0.3% (0.2)     | 0.4693        |
| <b>High activity</b>    | 15.1% (0.8)          | 12.1% (1.3)    | 0.0608        |
| <b>Urban residence</b>  | 71.0% (2.4)          | 69.6% (3.0)    | 0.5131        |
| <b>With spouse</b>      | 67.7% (1.1)          | 58.3% (2.1)    | <0.0001       |
| <b>High education</b>   | 22.0% (1.0)          | 14.7% (1.5)    | <0.0001       |
| <b>Low income</b>       | 33.9% (1.1)          | 42.8% (2.0)    | <0.0001       |
| <b>Contraception</b>    | 21.2% (0.9)          | 21.6% (1.6)    | 0.8115        |
| <b>HRT</b>              | 13.5% (0.7)          | 8.2% (1.1)     | <b>0.0002</b> |
| <b>BMI ≥25</b>          | 24.2% (0.1)          | 24.4% (0.1)    | 0.0593        |
| <b>WC ≥85</b>           | 82.3% (0.2)          | 83.0% (0.3)    | 0.0673        |

20  
21  
22  
23  
24  
25  
26  
27  
28  
29  
30  
31  
32  
33  
34  
35  
36  
37  
38  
39 An age-adjusted logistic regression model was used.

40 (P<0.05 indicates statistical significance; ()): standard error

41 N: Number in a group

42 BMI: Body mass index (kg/m<sup>2</sup>)

43 WC: Waist circumference (cm)  
44  
45  
46  
47  
48  
49  
50  
51  
52  
53  
54  
55  
56  
57  
58  
59  
60

**Table 2.** Risk analysis of spinal OA with other related factors.

|                                 | OR       | 95% CI      | P-value       |
|---------------------------------|----------|-------------|---------------|
| <b>Age</b>                      | <b>1</b> |             |               |
| <b>Smoking</b>                  | 0.711    | 0.454–1.114 | 0.1367        |
| <b>Drinking (heavy)</b>         | 0.853    | 0.220–3.308 | 0.8182        |
| <b>High activity</b>            | 0.892    | 0.676–1.178 | 0.4197        |
| <b>Urban residence</b>          | 1.077    | 0.870–1.332 | 0.4960        |
| <b>With spouse</b>              | 1.031    | 0.837–1.269 | 0.7746        |
| <b>High education</b>           | 0.912    | 0.693–1.201 | 0.5127        |
| <b>Low income</b>               | 0.999    | 0.816–1.222 | 0.9889        |
| <b>Contraception</b>            | 1.037    | 0.838–1.283 | 0.7359        |
| <b>HRT</b>                      | 0.717    | 0.527–0.976 | <b>0.0344</b> |
| <b>BMI <math>\geq 25</math></b> | 1.094    | 0.926–1.291 | 0.2920        |
| <b>WC <math>\geq 85</math></b>  | 0.975    | 0.811–1.172 | 0.7884        |

An age-adjusted logistic regression model was used.  
(P<0.05 indicates statistical significance; ()): standard error)

**Table 3.** Prevalence and risk analysis for spinal OA with smoking in the HRT group.

|                 | Nonsmokers  | Smokers            | P-value      |
|-----------------|-------------|--------------------|--------------|
| <b>Spine OA</b> | 83.5% (1.8) | 98.4% (1.7)        | <b>0.025</b> |
| <b>Odds</b>     | <b>1</b>    | 11.32 (1.31–17.90) | <b>0.027</b> |

Age, BMI, WC, drinking, and exercise were adjusted.

(P<0.05 indicates statistical significance; ()): standard error, 95% CI)

**Table 4.** The prevalence of hormone therapy according to spinal pain and radiographic OA.

|                | No HRT |             | HRT |             | P-value           |
|----------------|--------|-------------|-----|-------------|-------------------|
|                | N      | %           | N   | %           |                   |
| <b>OA</b>      |        |             |     |             |                   |
| <b>Grade 0</b> | 696    | 19.8% (1.0) | 184 | 30.2% (2.4) | <b>&lt;0.0001</b> |
| <b>Grade 1</b> | 1454   | 40.8% (1.0) | 253 | 46.5% (2.5) |                   |
| <b>Grade 2</b> | 1527   | 39.4% (1.1) | 151 | 23.3% (2.1) |                   |
| <b>Sx</b>      | 1302   | 34.7% (1.1) | 162 | 26.0% (2.2) | <b>0.0005</b>     |
| <b>OA + Sx</b> | 819    | 21.0% (1.1) | 85  | 13.1% (2.1) | <b>&lt;0.0001</b> |

An age-adjusted logistic regression model was used.

(P<0.05 indicates statistical significance; ()): standard error)

OA: Participants with only radiological findings;

Sx: Participants with only symptoms;

OA+Sx: Participants with both symptoms and radiological findings.



**Table 5.** Risk analysis of spinal OA with hormone therapy.

| HRT            | OR    | 95% CI      | P-value      |
|----------------|-------|-------------|--------------|
| <b>OA</b>      | 0.723 | 0.563–0.929 | <b>0.011</b> |
| <b>Sx</b>      | 0.916 | 0.723–1.159 | 0.464        |
| <b>OA + Sx</b> | 0.717 | 0.527–0.976 | <b>0.034</b> |

An age-adjusted logistic regression model was used.

(P<0.05 indicates statistical significance; ()): standard error)

OA: Participants with only radiological findings;

Sx: Participants with only symptoms;

OA+Sx: Participants with both symptoms and radiological findings.

1  
2  
3  
4  
5  
6  
7  
8  
9  
10  
11  
12  
13  
14  
15  
16  
17  
18  
19  
20  
21  
22  
23  
24  
25  
26  
27  
28  
29  
30  
31  
32  
33  
34  
35  
36  
37  
38  
39  
40  
41  
42  
43  
44  
45  
46  
47  
48  
49  
50  
51  
52  
53  
54  
55  
56  
57  
58  
59  
60

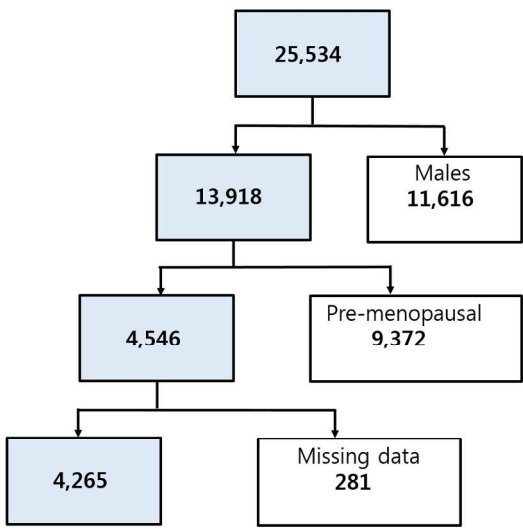

338x190mm (300 x 300 DPI)

review only

## STROBE Statement

Checklist of items that should be included in reports of observational studies

| Section/Topic            | Item No | Recommendation                                                                                                                                                                             | Reported on Page No |
|--------------------------|---------|--------------------------------------------------------------------------------------------------------------------------------------------------------------------------------------------|---------------------|
| Title and abstract       | 1       | (a) Indicate the study's design with a commonly used term in the title or the abstract                                                                                                     | 2                   |
|                          |         | (b) Provide in the abstract an informative and balanced summary of what was done and what was found                                                                                        | 2                   |
| <b>Introduction</b>      |         |                                                                                                                                                                                            |                     |
| Background/rationale     | 2       | Explain the scientific background and rationale for the investigation being reported                                                                                                       | 3                   |
| Objectives               | 3       | State specific objectives, including any prespecified hypotheses                                                                                                                           | 3                   |
| <b>Methods</b>           |         |                                                                                                                                                                                            |                     |
| Study design             | 4       | Present key elements of study design early in the paper                                                                                                                                    | 4                   |
| Setting                  | 5       | Describe the setting, locations, and relevant dates, including periods of recruitment, exposure, follow-up, and data collection                                                            | 4                   |
|                          |         | (a) <i>Cohort study</i> —Give the eligibility criteria, and the sources and methods of selection of participants. Describe methods of follow-up                                            |                     |
| Participants             | 6       | <i>Case-control study</i> —Give the eligibility criteria, and the sources and methods of case ascertainment and control selection. Give the rationale for the choice of cases and controls | 4-6                 |
|                          |         | <i>Cross-sectional study</i> —Give the eligibility criteria, and the sources and methods of selection of participants                                                                      |                     |
| Variables                | 7       | (b) <i>Cohort study</i> —For matched studies, give matching criteria and number of exposed and unexposed                                                                                   | 4-6                 |
|                          |         | <i>Case-control study</i> —For matched studies, give matching criteria and the number of controls per case                                                                                 |                     |
| Data sources/measurement | 8*      | Clearly define all outcomes, exposures, predictors, potential confounders, and effect modifiers. Give diagnostic criteria, if applicable                                                   | 4-6                 |
| Bias                     | 9       | For each variable of interest, give sources of data and details of methods of assessment (measurement). Describe comparability of assessment methods if there is more than one group       | 4                   |
| Study size               | 10      | Describe any efforts to address potential sources of bias                                                                                                                                  | 4-6                 |
| Quantitative variables   | 11      | Explain how the study size was arrived at                                                                                                                                                  | 4                   |
|                          |         | Explain how quantitative variables were handled in the analyses. If applicable, describe which groupings were chosen and why                                                               | 5-6                 |
| Statistical methods      | 12      | (a) Describe all statistical methods, including those used to control for confounding                                                                                                      | 4-6                 |
|                          |         | (b) Describe any methods used to examine subgroups and interactions                                                                                                                        | 4-6                 |
|                          |         | (c) Explain how missing data were addressed                                                                                                                                                | 4-6                 |
|                          |         | (d) <i>Cohort study</i> —If applicable, explain how loss to follow-up was addressed                                                                                                        |                     |
|                          |         | <i>Case-control study</i> —If applicable, explain how matching of cases and controls was addressed                                                                                         | 4-6                 |
|                          |         | <i>Cross-sectional study</i> —If applicable, describe analytical methods taking account of sampling strategy                                                                               |                     |
|                          |         | (e) Describe any sensitivity analyses                                                                                                                                                      | 4-6                 |

| Section/Topic            | Item No | Recommendation                                                                                                                                                                                               | Reported on Page No |
|--------------------------|---------|--------------------------------------------------------------------------------------------------------------------------------------------------------------------------------------------------------------|---------------------|
| <b>Results</b>           |         |                                                                                                                                                                                                              |                     |
| Participants             | 13*     | (a) Report numbers of individuals at each stage of study—eg numbers potentially eligible, examined for eligibility, confirmed eligible, included in the study, completing follow-up, and analysed            | 7                   |
|                          |         | (b) Give reasons for non-participation at each stage                                                                                                                                                         | 7                   |
|                          |         | (c) Consider use of a flow diagram                                                                                                                                                                           | 7                   |
| Descriptive data         | 14*     | (a) Give characteristics of study participants (eg demographic, clinical, social) and information on exposures and potential confounders                                                                     | 7                   |
|                          |         | (b) Indicate number of participants with missing data for each variable of interest                                                                                                                          | 7                   |
|                          |         | (c) <i>Cohort study</i> —Summarise follow-up time (eg, average and total amount)                                                                                                                             | 7                   |
| Outcome data             | 15*     | <i>Cohort study</i> —Report numbers of outcome events or summary measures over time                                                                                                                          | 7                   |
|                          |         | <i>Case-control study</i> —Report numbers in each exposure category, or summary measures of exposure                                                                                                         | 7                   |
|                          |         | <i>Cross-sectional study</i> —Report numbers of outcome events or summary measures                                                                                                                           | 7                   |
| Main results             | 16      | (a) Give unadjusted estimates and, if applicable, confounder-adjusted estimates and their precision (eg, 95% confidence interval). Make clear which confounders were adjusted for and why they were included | 7                   |
|                          |         | (b) Report category boundaries when continuous variables were categorized                                                                                                                                    | 7                   |
|                          |         | (c) If relevant, consider translating estimates of relative risk into absolute risk for a meaningful time period                                                                                             | 7                   |
| Other analyses           | 17      | Report other analyses done—eg analyses of subgroups and interactions, and sensitivity analyses                                                                                                               | 7                   |
| <b>Discussion</b>        |         |                                                                                                                                                                                                              |                     |
| Key results              | 18      | Summarise key results with reference to study objectives                                                                                                                                                     | 8                   |
| Limitations              | 19      | Discuss limitations of the study, taking into account sources of potential bias or imprecision. Discuss both direction and magnitude of any potential bias                                                   | 10                  |
| Interpretation           | 20      | Give a cautious overall interpretation of results considering objectives, limitations, multiplicity of analyses, results from similar studies, and other relevant evidence                                   | 9                   |
| Generalisability         | 21      | Discuss the generalisability (external validity) of the study results                                                                                                                                        | 8-11                |
| <b>Other Information</b> |         |                                                                                                                                                                                                              |                     |
| Funding                  | 22      | Give the source of funding and the role of the funders for the present study and, if applicable, for the original study on which the present article is based                                                | 12                  |

\*Give information separately for cases and controls in case-control studies and, if applicable, for exposed and unexposed groups in cohort and cross-sectional studies.

**Note:** An Explanation and Elaboration article discusses each checklist item and gives methodological background and published examples of transparent reporting. The STROBE checklist is best used in conjunction with this article (freely available on the Web sites of PLoS Medicine at <http://www.plosmedicine.org/>, Annals of Internal Medicine at <http://www.annals.org/>, and Epidemiology at <http://www.epidem.com/>). Information on the STROBE Initiative is available at [www.strobe-statement.org](http://www.strobe-statement.org).
